1

2 **Functional remodeling of lysosomes by type I interferon modifies host defense**

3

4

5 Hailong Zhang<sup>1,2,3</sup>, Abdelrahim Zoued<sup>1,2,3</sup>, Xu Liu<sup>1,2,3</sup>, Brandon Sit<sup>1,2</sup>, Matthew K. Waldor<sup>1,2,3\*</sup>

6

7 1Division of Infectious Diseases, Brigham and Women's Hospital, Boston, Massachusetts, USA

8 2Department of Microbiology, Harvard Medical School, Boston, Massachusetts, USA

9 3Howard Hughes Medical Institute, Boston, Massachusetts, USA

10 \*Correspondence: [mwaldor@research.bwh.harvard.edu](mailto:mwaldor@research.bwh.harvard.edu)

11

12

13

14 **SUMMARY**

15 The degradative activity of lysosomes is essential for cellular homeostasis and also functions in  
16 innate defense against intracellular microbes. Pathogens commonly modify lysosome and other  
17 organelle functions to promote virulence, but host factors that stimulate organelle re-modeling  
18 remain largely uncharacterized. Here, a CRISPR/Cas9 screen in intestinal epithelial cells with  
19 *Salmonella*, a prototypical intracellular bacterial pathogen, led us to discover that type I  
20 interferon (IFN-I) governs lysosome function. IFN-I signaling modified the localization,  
21 acidification, protease activity and proteomic profile of lysosomes, amplifying intracellular  
22 *Salmonella* virulence gene expression and host cell death. IFN-I promoted *in vivo Salmonella*  
23 pathogenesis not only in bone marrow-derived cells, but also in the intestinal epithelium, where  
24 *Salmonella* initiates infection. Our findings explain how a bacterial pathogen co-opts epithelial  
25 IFN-I signaling, and unveil an unexpected role for IFN-I signaling in control of lysosomal  
26 function. We propose that immune signal-induced organelle remodeling at barrier surfaces may  
27 broadly impact host defense against diverse infectious agents.

28

29

30 **KEYWORDS**

31 Type I interferon, Lysosome remodeling, *Salmonella* pathogenesis, Intestinal epithelium

32

## 33 INTRODUCTION

34 The innate immune system is essential for initial recognition of and defense against  
35 microbial pathogens at epithelial surfaces (Philpott et al., 2001). To counter these control  
36 mechanisms, pathogens have evolved virulence strategies to antagonize immune function  
37 (Reddick and Alto, 2014). Often these strategies involve direct manipulation of host cellular  
38 processes by bacterial factors such as secreted or injected protein effectors that disrupt immune  
39 responses and/or promote pathogen survival.

40 Compared to their extracellular counterparts, intracellular bacterial pathogens evade host  
41 immune surveillance and other external threats (e.g. antibiotics) by employing intricate  
42 virulence programs that enable them to enter and survive inside host cells (Hybiske and  
43 Stephens, 2008). In this niche, intracellular pathogens interact with and exploit the functions of  
44 host cell organelles to support their proliferation and virulence (Omotade and Roy, 2019). As a  
45 result of their intimate relationship with host cell organelles, intracellular pathogens have  
46 proven to be outstanding tools to probe basic eukaryotic cell biology. One model intracellular  
47 bacterium is *Salmonella enterica* serovar Typhimurium (*Stm*), a food-borne pathogen that  
48 initially invades and subsequently kills intestinal epithelial cells (IECs) before spreading  
49 systemically via circulating phagocytes (Hurley et al., 2014). A hallmark of *Stm* infection in  
50 IECs is formation of the *Salmonella*-containing vacuole (SCV), a dynamic, lysosome-like  
51 compartment that is permissive for *Stm* replication (Steele-Mortimer, 2008; Tuli and Sharma,  
52 2019). Although *Stm*'s entry into and initial trafficking inside host cells is well-characterized,  
53 the IEC pathways that control *Stm*-induced cytotoxicity remain incompletely defined.

54 One striking feature of the host cytokine response to *Stm* is the induction of type I  
55 interferons (IFN-Is) (Hess et al., 1989). IFN-Is trigger intracellular anti-microbial  
56 transcriptional programs consisting of over 400 IFN-stimulated genes (ISGs). Due to the large  
57 size of the “interferome” and the complex interactions of ISGs with thousands of additional  
58 cellular proteins (Hubel et al., 2019), knowledge of the full spectrum of IFN-I-mediated  
59 changes in cellular function is incomplete. An increasing body of evidence indicates that in  
60 contrast to their canonical antiviral roles, IFN-Is sensitize the host to several intracellular  
61 bacterial pathogens, including *Stm* (Robinson et al., 2012). The molecular mechanisms that  
62 have been proposed to account for this phenotype have focused solely on the effects of IFN-I in  
63 phagocytic immune cell lineages (Dorhoi et al., 2014; Hos et al., 2017; Perkins et al., 2015).

64 Here, while defining the host IEC factors required for *Stm* cytotoxicity with a  
65 genome-scale CRISPR/Cas9 screen, we discovered a novel role for IFN-I signaling. Even in the  
66 absence of infection, we observed that IFN signaling modified epithelial cell lysosomal  
67 localization, pH and protease activity. Organellar proteomics revealed that at least 15 ISGs were  
68 enriched in lysosomes following IFN-I stimulation and one of these enriched ISGs, IFITM3,  
69 was found to directly impact lysosomal function. IFN-I signaling-dependent lysosomal  
70 acidification stimulated *Stm* virulence gene expression, facilitating *Stm*-mediated epithelial cell  
71 death. Moreover, epithelial IFN-I signaling promoted *Stm* pathogenesis *in vivo*. Thus, IFN-I  
72 signaling-induced lysosomal remodeling at barrier surfaces impacts host defense, even in  
73 non-immune cell subsets.

74

## 75 **RESULTS**

### 76 **IFN-I signaling enhances *Stm* cytotoxicity**

77 To identify host genes that confer resistance to *Stm* cytotoxicity, we performed a multi-round,  
78 genome-scale CRISPR/Cas9 loss-of-function screen in the human colonic epithelial cell line  
79 HT29-Cas9 (Blondel et al., 2016) (Figure 1A). The screen identified known pathways that  
80 sensitize cells to *Stm* infection, including those involved in regulation of actin dynamics  
81 (Arp2/3 and Rac), which are important in pathogen invasion (Unsworth et al., 2004; Yeung et  
82 al., 2019), along with pathways not previously linked to *Stm* virulence, such as the Fc-gamma  
83 receptor-dependent phagocytic and GPI anchor modification pathways (Table S1 and Figures  
84 S1A, B). Strikingly, the top enriched sgRNAs from both screened libraries represented the  
85 entire type I IFN (IFN-I) signaling pathway, including the receptor (IFNAR1/2), adaptor  
86 (JAK1/TYK2), and transcription factor (STAT1/2/IRF9) components of the system (Figures 1B,  
87 C). *Stm* induces IFN-I production during infection (Hess et al., 1989), and IFN-I signaling in  
88 immune cells such as macrophages has been identified as a host susceptibility factor for *Stm*  
89 (Robinson et al., 2012), but the contribution of IFN-I signaling in IECs is unknown. A clonal  
90 knockout of *Ifnar2*, the top enriched hit in both libraries, was constructed in the HT29-Cas9 cell  
91 line (Figure S1C), to confirm the screen findings. At both early and late infection time points,  
92 *Ifnar2* KO cells were more resistant to *Stm*-induced cell death than the wild-type (WT) parental  
93 line (Figures 1D and S1D, E). Priming cells with IFN $\beta$  (a major IFN-I), conditions which  
94 mimic the multiple rounds of the original screen, further sensitized WT but not *Ifnar2* KO cells  
95 to death (Figure 1D). We next tested whether IFN-I-promoted death depended on SPI-1 or

96 SPI-2, critical *Salmonella* pathogenicity islands that each encode type 3 secretion systems  
97 (T3SS) required for cellular invasion and intracellular survival, respectively (Galan et al., 2014).  
98 SPI-1-deficient ( $\Delta prgH$ ) *Stm* did not induce cell death in any condition, confirming that  
99 cytotoxicity in IECs requires cell invasion. SPI-2-deficient ( $\Delta ssaV$ ) *Stm* led to reduced but still  
100 detectable levels of cytotoxicity that remained sensitive to IFN $\beta$  priming, suggestive of both  
101 SPI-2-dependent and independent mechanisms of cytotoxicity (Figure 1D). Treatment with the  
102 JAK inhibitors ruxolitinib and pyridone-6 also blocked *Stm*-induced death in WT cells,  
103 indicating active IFN-I signaling is required for this phenotype (Figure S1F). Flow cytometry of  
104 HT29 or HeLa cells infected with fluorescent *Stm* and stained with the cell death probe  
105 Annexin-V indicated that IFN-I only influenced cell death in the population of cells that  
106 contained intracellular *Stm* (Figures 1E and S1G-I). IFN-I signaling did not impact *Stm* invasion  
107 (Figures 1F and S1J), nor did it influence bacterial association with the early endosomal marker  
108 Rab5, late endosomal marker Rab7 or lysosomal marker LAMP1 (Desjardins et al., 1994)  
109 (Figures 1G, H and S1K-N). Thus, we hypothesized that IFN-I-mediated sensitization of  
110 epithelial cells to *Stm* occurs downstream of cell invasion and initial SCV formation.

111

### 112 **IFN-I controls lysosome localization and function**

113 During our investigation of SCV formation in IFN $\beta$ -treated cells, we unexpectedly observed  
114 that even in the absence of infection, IFN-I signaling impacts epithelial cell lysosomal  
115 localization and function. In HeLa cells, lysosomes (identifiable as LAMP1+/Lysotracker+  
116 co-staining organelles) were scattered throughout the cytoplasm under basal conditions.

117 However, following IFN $\beta$  stimulation, lysosomes re-localized to the perinuclear region (Figures  
118 2A, B); lysosome re-localization was not observed in *Ifnar2* KO HeLa cells, confirming that  
119 this response was dependent on IFN-I signaling. Furthermore, IFN $\beta$  priming led to significantly  
120 higher intensity of two fluorescent reporters (Lysotracker and Lysosensor) of lysosomal pH in  
121 WT but not *Ifnar2* KO cells, indicating that IFN-I signaling lowers lysosomal pH (Figures 2C  
122 and S2A-C). The activity of most resident lysosomal proteins, like cathepsins and other  
123 degradative enzymes, is positively regulated by acidic pH (Butor et al., 1995). Staining with  
124 fluorescent reporters of general lysosomal protease activity (DQ-BSA (Reis et al., 1998)), or  
125 cathepsin D (a major lysosomal protease) activity revealed that their activities were elevated by  
126 IFN $\beta$  stimulation in an *Ifnar2*-dependent fashion (Figures 2D, E and S2D). Importantly,  
127 IFN $\beta$ -induced lysosomal acidification and protease activation was abolished by the addition of  
128 the v-ATPase inhibitor bafilomycin A1 (Bfa1) (Yoshimori et al., 1991) (Figures 2C, D),  
129 demonstrating that IFN-I signaling primarily relies on the conventional lysosomal acidification  
130 machinery. IFN-I did not impact dextran uptake, suggesting that IFN-I signaling does not  
131 impact general endocytic trafficking (Figure S2E). Together, these observations reveal that  
132 IFN-I signaling promotes epithelial cell lysosomal relocalization, acidification and degradative  
133 activity, even in the absence of infection. IFN $\beta$  treatment also reduced lysosomal pH in  
134 monocyte/macrophage-like THP-1 cells (Figure S2F), suggesting that IFN-I signaling controls  
135 lysosomal acidification in additional cell lineages.

136

137 **The ISG IFITM3 regulates lysosomal function**

138 To investigate the mechanisms by which IFN-I modifies lysosomal function, we profiled the  
139 proteomes of intact lysosomes (Abu-Remaileh et al., 2017) purified from WT or *Ifnar2* KO  
140 cells in basal or IFN $\beta$ -stimulated states. The purity and integrity of our lysosome samples was  
141 confirmed by verifying the presence of luminal cathepsin D and absence of cytosolic and Golgi  
142 apparatus markers (Figures 3A and S3A). Quantitative profiling revealed that the abundances of  
143 ~20 proteins, most of them ISGs, were increased in purified lysosomes upon IFN $\beta$  stimulation  
144 (Figure 3B). Among these proteins was IFITM3, an IFN-induced transmembrane protein which  
145 has been shown to inhibit viral entry and has been proposed to interact with the lysosomal  
146 v-ATPase complex (Amini-Bavil-Olyaei et al., 2013; Wee et al., 2012). Concordant with the  
147 mass spectrometry analyses, IFITM3 was significantly enriched in the purified lysosomes, in  
148 contrast with IFIT3, a cytosolic ISG (Figure 3A). Immunofluorescence analysis revealed that  
149 IFITM3 co-localized with LAMP1, but not Rab5, confirming that IFITM3 is a lysosomal  
150 protein (Figure 3C).

151 Remarkably, lysosomal pH in *Ifitm3* KO cells was heightened in both basal and  
152 IFN $\beta$ -priming conditions relative to WT cells, partially phenocopying the *Ifnar2* KO,  
153 suggesting IFITM3 contributes to IFN-I-mediated lysosomal acidification (Figures 3D and  
154 S3B). *Ifitm3*'s contribution to basal pH levels are consistent with the tonic activities of IFNs  
155 observed in diverse mammalian cell types (Schoggins et al., 2014). Given that both lysosomal  
156 pH and degradative activity in *Ifitm3* KO cells were still somewhat sensitive to IFN $\beta$  priming  
157 (Figures 3D, E), we speculate that additional IFN-I-induced factors (including those in Figure  
158 3B) contribute to this process.



159

## 160 **IFN-I triggers *Stm* virulence gene expression**

161 SPI-2 induction is linked to SCV maturation, a process that requires dynamic interactions with  
162 multiple organelles including lysosomes (Santos et al., 2015). We hypothesized that IFN-I's  
163 role in lysosomal remodeling might stimulate expression of *Stm* SPI-2-encoded and other  
164 virulence genes because reduced pH stimulates their expression (Chakraborty et al., 2015; Prost  
165 et al., 2007). Expression of SPI-1 genes, which encode invasion-specific functions, was not  
166 altered in infections with IFN $\beta$  priming or in *Ifnar2* KO cells (Figures 4A and S4A). However,  
167 IFN $\beta$  priming increased expression of SPI-2 encoded genes (Figures 4B and S4B). These genes  
168 were only induced after SCV formation (i.e. later than one-hour post infection), and the effect  
169 of IFN $\beta$  priming was eliminated in *Ifnar2* KO cells. Bfa1 treatment abolished IFN $\beta$  induction  
170 of SPI-2 expression (Figures 4B and S4B), consistent with the idea that alteration of SCV  
171 acidification is the primary mechanism of IFN-I-enhanced SPI-2 induction. Measurement of  
172 SPI-2 induction with a fluorescent *P<sub>sifB</sub>::gfp* reporter strain (Garmendia et al., 2003) confirmed  
173 this phenotype at single bacterial cell resolution (Fig. 4C). Similar expression trends were  
174 observed in *Stm* acid-induced, virulence-associated genes that are not encoded within and  
175 functions independently of SPI-2 (Gunn et al., 1995) (Figures 4D and S4C, D). This is  
176 consistent with our above observation (Figure 1D) that SPI-2-deficient *Stm* retain some  
177 cytotoxicity. Together, these data indicate that IFN-I-mediated lysosomal remodeling promotes  
178 *Stm*'s intracellular virulence gene expression.

179 The *Stm* virulence program can lead to breakage of the SCV, exposing the pathogen to the

180 host cytosol (Roy et al., 2004; Xu et al., 2019). In infected IFN $\beta$ -primed WT HeLa cells, ~60%  
181 of *Stm* stained positive for galectin-3, a marker of the ruptured SCV (Thurston et al., 2012),  
182 whereas <20% of *Stm* were galectin-3+ in infected *Ifnar2* KO cells (Figures 4E, F). To assess  
183 whether the pathogen was cytosol-exposed as a consequence of SCV rupture, infected cells  
184 were treated with high concentrations of gentamicin, an antibiotic that can penetrate into cells at  
185 high concentrations (Myrdal et al., 2005). *Stm* in IFN $\beta$ -treated WT cells were markedly more  
186 sensitive to gentamicin, than bacteria in IFN $\beta$ -treated *Ifnar2* KO cells (Figure 4G), suggesting  
187 that IFN-I activation of *Stm* virulence gene expression promotes SCV rupture and facilitates the  
188 pathogen's access to the cytosol. The confinement of *Stm* to the intravacuolar space in  
189 IFN-I-deficient cells could explain their protection from *Stm*-induced cytotoxicity and the  
190 identification of IFN-I signaling as a host susceptibility factor in our screen.

191

### 192 **IFN-I promotes epithelial *Stm* pathogenesis *in vivo***

193 To understand the importance of IFN-I signaling in *Stm* pathogenesis, we first used a more  
194 physiologic culture system - primary human-derived small intestinal organoids. IFN $\beta$  priming  
195 of organoids increased cell death associated with *Stm* infection, whereas treatment of organoids  
196 with pyridone-6 had the opposite effect (Figures 5A, B). The absence of immune cells such as  
197 macrophages in this system supports the idea that IFN-I signaling promotes *Stm* pathogenicity  
198 in IECs.

199

200 To further dissect the importance of epithelial IFN-I signaling in the context of *in vivo Stm*

201 infection, we used bone marrow transfers to generate chimeric C57BL/6 mice that had *Ifnar1*  
202 deleted in only the hematopoietic compartment or in other bodily tissues, including epithelial  
203 surfaces (Figure S5A). Following intraperitoneal delivery of poly:IC to induce IFN $\beta$  production  
204 (Lauterbach et al., 2010), chimeric mice were oro-gastrically inoculated with *Stm* to assess the  
205 roles of hematopoietic and epithelial compartments in resistance to infection (Figure 5C). Mice  
206 with WT epithelia and KO bone marrow were relatively resistant to *Stm* infection, with reduced  
207 weight loss and distal organ bacterial loads compared to mice that had WT epithelia and bone  
208 marrow (Figures 5D, E), consistent with previous observations that immune cell IFN-I  
209 signaling promotes *Stm* pathogenesis (Robinson et al., 2012). Strikingly, we observed a similar  
210 phenotype in mice with KO epithelia and WT bone marrow (Figures 5D, E), suggesting that  
211 IEC IFN-I signaling also enhances *Stm* pathogenicity during infection. Mice that had both KO  
212 epithelia and bone marrow were more protected than either chimera, consistent with the idea  
213 that *Stm* takes advantage of IFN-I signaling in both the gut epithelium as well as in bone  
214 marrow-derived cells. Histological analyses revealed similar levels of tissue damage in both  
215 chimeras (Figures 5F, G); however, finer-scale immunofluorescence studies with TUNEL  
216 staining to quantify cell death showed that TUNEL<sup>+</sup> (dying) cells tracked with the WT  
217 compartment. In *Stm*-infected chimeric mice with WT bone marrow, cell death was primarily  
218 localized to E-cadherin-negative cells in the lamina propria. In contrast, in chimeric mice with  
219 WT epithelium, TUNEL staining primarily co-localized with E-cadherin-positive IECs (Figures  
220 5H, I). Together, these *in vivo* studies suggest that IFN-I signaling in the epithelial compartment  
221 facilitates *Stm*-induced IEC death and pathogen spread.

## 222 DISCUSSION

223 Our work underscores the utility of model intracellular pathogens like *Stm* as probes for the  
224 investigation of fundamental cell processes. Our initial genome-scale CRISPR/Cas9 screen  
225 revealed that IFN-I signaling sensitizes epithelial cells to *Stm* cytotoxicity, a phenotype we  
226 verified *in vitro* and *in vivo* with bone marrow chimeric mice. We found that IFN-I-dependent  
227 lysosome acidification in IECs stimulated *Stm* virulence gene expression and exacerbated cell  
228 death, offering a molecular mechanism for these observations. Strikingly, we found that  
229 infection was not necessary for IFN-I to modulate the localization, acidification and protease  
230 activity of lysosomes. In sum, by dissecting *Stm*'s interaction with the host, we identified and  
231 charted a previously unrecognized pathway by which lysosome function can be controlled.

232 IFN-I is widely known as an antiviral immune signal, but substantial evidence has revealed  
233 it is also a susceptibility factor for several human intracellular bacterial pathogens, including *L.*  
234 *monocytogenes* and *M. tuberculosis* (Auerbuch et al., 2004; Boxx and Cheng, 2016; Ji et al.,  
235 2019; O'Connell et al., 2004; Zhang et al., 2018). Studies of the bases for these phenotypes  
236 have primarily focused on immune-mediated explanations (Auerbuch et al., 2004; Dorhoi et  
237 al., 2014; Ji et al., 2019; O'Connell et al., 2004). For *Stm*, proposed mechanisms have invoked  
238 elevated macrophage necroptosis (Hos et al., 2017; Robinson et al., 2012) and transcriptional  
239 reprogramming (Perkins et al., 2015), altered dendritic cell homeostasis (Stefan et al., 2017),  
240 and increased neutrophil-mediated inflammation (Wilson et al., 2019). We propose that in  
241 addition to these immune-centric mechanisms, IFN-I-induced remodeling of epithelial cell  
242 lysosomes directly impacts the *Stm* virulence program and shapes the outcome of infection.

243 Our findings suggest that IFN-I signaling can modify innate defense in the epithelial as well as  
244 the immune compartment. The contribution of IFN-I modulation of lysosome function to *Stm*  
245 infection in non-epithelial cells, such as macrophages, requires further study. It remains an  
246 open question whether *Stm* purposely stimulates and exploits IFN-I signaling as part of its  
247 pathogenic strategy.

248 While we found that IFN-I-induced lysosomal acidification sensitizes cells to a bacterial  
249 pathogen, our finding that many other known ISGs with antiviral properties, such as IFITM3,  
250 were enriched in lysosomal proteomes from IFN-I-stimulated cells leads us to speculate that  
251 this mechanism may be protective against viral threats. IFN-I-mediated lysosomal remodeling  
252 may also play a role in non-infectious pathologies, such as lysosomal cholesterol accumulation  
253 (Kuhnl et al., 2018) and other lysosome-related disorders. It remains unclear whether these  
254 effects might be driven by the tonic IFN-I signaling that occurs in many tissues (Schoggins et  
255 al., 2014), or instead require pathogenic over-induction of IFN-I.

256 To our knowledge, our study provides the first evidence showing that IFN-I signaling  
257 governs the composition and function of an organelle – the lysosome. It will be of interest to  
258 determine whether other immune signals (i.e. IFN-II and other cytokines) can also direct  
259 lysosomal remodeling. Furthermore, IFNs and other cytokines may also promote the functional  
260 remodeling of other organelles, such as the mitochondria and endoplasmic reticulum, under  
261 homeostasis and in diverse pathogenic contexts. Such activities may constitute a broadly  
262 applicable lens through which to view and enhance our understanding of the cell biology of  
263 innate defense.

264 **AUTHORCONTRIBUTIONS**

265 H.L.Z. and M.K.W. conceived and all authors designed the study. H.L.Z., A.Z., and X.L.  
266 performed all experiments and analyzed data. H.L.Z., B.S., and M.K.W. wrote the manuscript  
267 and all authors edited the paper.

268

269 **ACKNOWLEDGEMENTS**

270 We thank members of the Waldor lab for helpful discussions on all aspects of this project, Dr.  
271 David Breault at the Harvard Digestive Diseases Center (HDDC) Organoid Core for the  
272 primary human small intestine organoids; and Michal Pyzik from Dr. Richard Blumberg's lab  
273 for assistance in creation of bone marrow chimeric mice.

274 Research in the M.K.W. laboratory is supported by HHMI and NIH grant R01 AI-042347. A.Z.  
275 was supported by an EMBO long-term fellowship (ALTF 1514-2016) and by a HHMI  
276 Fellowship of the Life Sciences Research Foundation.

277

278 **DECLARATION OF INTERESTS**

279 The authors declare no competing interests.

280

281 **Figure 1.A genome-scale screen reveals IFN-I promotes *Stm* cytotoxicity**

282 (A) Workflow for CRISPR/Cas9 *Stm* cytotoxicity screen in HT29-Cas9 cells.

283 (B) Scatterplots showing normalized reads enrichment of specific sgRNAs in two libraries (A  
284 and B) after 4 rounds of *Stm* infection. Genes involved in IFN-I signaling are delineated by the  
285 dashed red circle.

286 (C) Overview of IFN-I signaling pathway. Numbers correspond to hit ranks in each library.

287 (D) Survival of IFN $\beta$ -primed or unprimed WT or *Ifnar2* KO HT29 cells 4 hours post WT or  
288 mutant *Stm* infection. Mean  $\pm$  s.d., n = 3.

289 (E) Flow cytometry of IFN $\beta$ -primed or unprimed WT and *Ifnar2* KO HT29 cells 20 hours post  
290 mCherry-*Stm* infection and stained with Annexin V-FITC. FITC, fluorescein isothiocyanate.

291 (F) Flow cytometric quantification of invasion of HT29 cells by mCherry-*Stm*. Mean  $\pm$  s.d., n =  
292 3.

293 (G) Representative images of LAMP1-RFP-expressing HeLa cells 4 hours post GFP-*Stm*  
294 infection. Boxed insets depict higher magnification showing bacterial colocalization with  
295 LAMP1-RFP. Scale bar, 10 $\mu$ m.

296 (H) Quantification of LAMP1-RFP-positive *Stm* from 10 fields. Mean  $\pm$  s.d., n = 3.

297 Statistical analysis was performed by two-tailed Student's *t* test (\*\*P < 0.01 and \*\*\*P < 0.001).

298 See also Figure S1 and Table S1.

299

300 **Figure 2. IFN-I signaling regulates lysosomal positioning, acidity, and protease activity**

301 (A) Representative images of lysosome (LAMP1-GFP+/LysoTracker+ compartment)

302 distribution in WT and *Ifnar2* KO HeLa cells with or without 16 hours of IFN $\beta$  stimulation.

303 Nuclei (blue) were stained with DAPI and actin (purple) was stained with phalloidin. Scale bar,

304 5 $\mu$ m.

305 (B) Quantification of perinuclear lysosome indices from 10 cells. Mean  $\pm$  s.d., n = 3.

306 (C-D) Flow cytometry of LysoTracker Red (C) and DQ-Green BSA fluorescence (D) in HeLa

307 cells  $\pm$ 16 hours of treatment with IFN $\beta$  or the lysosomal acidification inhibitor Bfa1. Vertical

308 dashed lines indicate the mean fluorescence value of the mock control in WT (red) or *Ifnar2*

309 KO (blue) cells.

310 (E) Relative cathepsin D activity in WT and *Ifnar2* KO HeLa cells  $\pm$  16 hours of IFN $\beta$

311 treatment. Mean  $\pm$  s.d., n = 5.

312 Statistical analysis was performed by two-tailed Student's *t* test (\*\*\*P < 0.001).

313 See also Figure S2.

314

### 315 **Figure 3. IFN-I signaling shapes the lysosomal proteome**

316 (A) Immunoblotting for known (LAMP1, CTSD) and suspected (IFITM3) lysosomal proteins

317 in whole-cell lysates (T) and purified lysosomes (IP).

318 (B) Relative fold change scatterplot of protein abundance in lysosomes purified from WT or

319 *Ifnar2* KO HeLa cells  $\pm$  16 hours of IFN $\beta$  treatment. Colored dots indicate proteins that are

320 known ISGs.

321 (C) Representative images of LAMP1-RFP or Rab5-RFP-expressing HeLa cells stained with

322 IFITM3 antibody (GFP). Nuclei (blue) were stained with DAPI. Scale bar, 5 $\mu$ m.



323 (D-E) Flow cytometry of LysoTracker Red (D) and DQ-Green BSA fluorescence (E) in WT,  
324 *Ifitm3* KO and *Ifnar2* KO HeLa cells  $\pm$  16 hours of IFN $\beta$  treatment.

325 See also Figure S3.

326

327 **Figure 4. IFN-I signaling promotes *Stm* virulence gene expression and SCV rupture**

328 Relative induction of SPI-1 (*prgH*) (A), SPI-2 (*ssaV*) (B) and PhoP-induced virulence gene  
329 (*pagD*) (D) in intracellular *Stm* from WT and *Ifnar2* KO HeLa cells  $\pm$  16 hours of drug  
330 treatment. Data are normalized to transcript levels in LB-cultured *Stm* (red). Mean  $\pm$  s.d., n = 3.

331 (C) Flow cytometry of intracellular P<sub>*sifB*</sub>::*gfp* *Stm* isolated from WT and *Ifnar2* KO HeLa cells  $\pm$   
332 16 hours of drug treatment. LB-cultured *Stm* were used as the mock control.

333 (E) Representative images of Gal3-GFP-expressing HeLa cells 4 hour post mCherry-*Stm*  
334 infection. Scale bar, 10 $\mu$ m.

335 (F) Quantification of the Gal3 positive SCVs from 10 cells. Mean  $\pm$  s.d., n = 3.

336 (G) Intracellular CFU counts from IFN $\beta$ -treated WT and *Ifnar2* KO HeLa cells 2 hour post *Stm*  
337 infection. Infected cells were treated with gentamicin (Gm) at the indicated concentrations  
338 ( $\mu$ g/ml). Data were normalized to the WT+IFN $\beta$  Gm 10 group. Mean  $\pm$  s.d., n = 5.

339 Statistical analysis was performed by two-tailed Student's *t* test (\*\*\*P < 0.001).

340 See also Figure S4 and Table S2.

341

342 **Figure 5. IFN-I signaling in intestinal epithelial cells promotes *Stm* pathogenesis.**

343 (A) Representative images of IFN $\beta$  or pyridone-6-primed or unprimed human small bowel

344 enteroids 20 hours post WT *Stm* infection. Propidium iodide (PI) staining was used to detect  
345 cell death. Scale bar, 100  $\mu\text{m}$ .

346 (B) Enteroid survival 20 hours post WT *Stm* infection. Mean  $\pm$  s.d., n = 3.

347 (C) Timeline of generation (top) and oral *Stm* infection (bottom) of *Ifnar1* chimeric mice.

348 (D) Body weights of *Stm*-infected chimeric mice. Mean  $\pm$  s.e.m., n = 12 mice.

349 (E) Liver and spleen *Stm* CFU burdens from chimeric mice 5 days post-*Stm* infection. Mean  $\pm$   
350 s.d., n = 12 mice.

351 (F) Representative H&E stained ileal sections from chimeric mice 5 days post-*Stm* infection.  
352 Scale bars, 100  $\mu\text{m}$ .

353 (G) Average histological scores of chimeric mice 5 days post-*Stm* infection from 8 fields. Mean  
354  $\pm$  s.d., n = 4 mice.

355 (H) Representative images of ileal sections from chimeric mice 5 days post-*Stm* infection. IECs  
356 were identified with E-cadherin (red), dying cells with TUNEL (green), and nuclei with DAPI  
357 (blue). The white dashed line marks the epithelial surface. Scale bar, 100  $\mu\text{m}$ .

358 (I) Quantification of TUNEL+/E-cadherin+ (red) or TUNEL+/E-cadherin- (blue) cells per field  
359 from 8 fields. Mean  $\pm$  s.d., n = 4 mice.

360 Statistical analysis was performed by two-tailed Student's *t* test in (B) and (G). Statistical  
361 analysis was performed by two-tailed Mann-Whitney U-test in (D) and (E). (\*P < 0.05, \*\*P <  
362 0.01 and \*\*\*P < 0.001).

363 See also Figure S5.

364

365 **Figure S1. IFN-I promotes *Stm* cytotoxicity but not affect *Stm* invasion and SCV**  
366 **maturation, Related to Figure 1**

367 (A) Adjusted p values for selected enriched Gene Ontology (GO) terms from GO-analyzed hits  
368 in the *Stm* cytotoxicity screen (upper threshold set at  $p < 1E-03$ ).

369 (B) Cytoscape visualization of enriched pathways.

370 (C) Relative expression of the IFN-I target gene *oas1* in WT and *Ifnar2* KO HT29 cells 16  
371 hours post-IFN $\beta$  treatment. Mean  $\pm$  s.d.,  $n = 3$ .

372 (D) Survival of IFN $\beta$ -primed or unprimed WT or *Ifnar2* KO HT29 cells 20 hours post WT or  
373 mutant *Stm* infection. Mean  $\pm$  s.d.,  $n = 3$ .

374 (E) Representative bright-field images of WT and *Ifnar2* KO HT29 cells 2 days post *Stm*  
375 infection. Scale bar, 250  $\mu$ m or 100  $\mu$ m, respectively.

376 (F) Survival of mock or drug-treated WT HT29 cells 20 hours post WT *Stm* infection. Mean  $\pm$   
377 s.d.,  $n = 3$ .

378 (G) Quantification of flow cytometry data in Figure 1E. Mean  $\pm$  s.d.,  $n = 4$ .

379 (H) Flow cytometry of IFN $\beta$ -primed or unprimed WT and *Ifnar2* KO HeLa cells 20 hours post  
380 mCherry-*Stm* infection and stained with Annexin V-FITC.

381 (I) Quantification of flow cytometry data from Figure S1F. Mean  $\pm$  s.d.,  $n = 4$ .

382 (J) Flow cytometry of IFN $\beta$ -primed WT and *Ifnar2* KO HT29 cells 4 hours post mCherry-*Stm*  
383 infection. Quantification is shown in Figure 1F.

384 (K) Representative images of Rab5-RFP-expressing HeLa cells at 4 hours post GFP-*Stm*  
385 infection. Scale bar, 10  $\mu$ m.

386 (L) Quantification of Rab5-RFP-positive *Stm* from 10 fields. Mean  $\pm$  s.d., n = 3.

387 (M) Representative images of Rab7-RFP-expressing HeLa cells 4 hours post GFP-*Stm* infection.

388 Scale bar, 10  $\mu$ m.

389 (N) Quantification of Rab7-RFP-positive *Stm* from 10 fields. Mean  $\pm$  s.d., n = 3.

390 Statistical analysis was performed by two-tailed Student's *t* test (\*P < 0.05, \*\*P < 0.01 and

391 \*\*\*P < 0.001).

392

393 **Figure S2. IFN-I signaling regulates lysosomal acidity, protease activity in both epithelial**  
394 **cell and THP1 cells, but not impact endocytic trafficking, Related to Figure 2**

395 (A) Quantification of mean fluorescence intensity (MFI) from Figure 2C. Mean  $\pm$  s.d., n = 3.

396 (B) Flow cytometry of LysoSensor staining in WT and *Ifnar2* KO HeLa cells  $\pm$  16 hours of  
397 IFN $\beta$  treatment.

398 (C) Flow cytometry of LysoTracker staining in HT29 cells  $\pm$  16 hours of drug treatment.

399 (D) Quantification of mean fluorescence intensity from Figure 2D. Mean  $\pm$  s.d., n = 3.

400 (E) Flow cytometry of Dextran-568 uptake in WT and *Ifnar2* KO HeLa cells  $\pm$  16 hours of  
401 IFN $\beta$  treatment.

402 (F) Flow cytometry of LysoTracker staining in monocytic macrophage-like THP1 cells  $\pm$  16  
403 hours of IFN $\beta$  treatment.

404 Statistical analysis was performed by two-tailed Student's *t* test (\*\*P < 0.01 and \*\*\*P < 0.001).

405

406 **Figure S3. Purity of isolated lysosomes and IFITM3 gene KO in HeLa cells, Related to**

407 **Figure 3**

408 (A) Immunoblotting for protein markers of indicated subcellular compartments in whole-cell  
409 lysates (T) and purified lysosomes (IP).

410 (B) Immunoblotting for IFITM3 in WT and *Ifitm3* KO HeLa cells  $\pm$  16 hours of IFN $\beta$   
411 treatment.

412

413 **Figure S4. Intracellular *Stm* virulence gene expression, Related to Figure 4**

414 (A-D) Relative induction of individual SPI-1 (A), SPI-2 (B), PhoP-induced (C) or SPI-3 (D)  
415 genes in intracellular *Stm* from WT and *Ifnar2* KO HeLa cells  $\pm$  drug treatment. Data are  
416 normalized to transcript levels from LB-cultured *Stm* (red). Mean  $\pm$  s.d., n = 3.

417 Statistical analysis was performed by two-tailed Student's *t* test (\*\*\*P < 0.001).

418

419 **Figure S5. Generation of chimeric mice by bone marrow transfer, Related to Figure 5**

420 (A-C) Flow cytometry of peripheral blood CD45.1 and CD45.2+ cells in mock and chimeric  
421 mice 4 weeks after bone marrow transplantation. WT mock mice carry CD45.2 allele but not  
422 CD45.1 (A), which is totally abolished by irradiation (B, C). 4 weeks later after CD45.1 BM  
423 transfer, the chimeric mice carry CD45.1 allele but not CD45.2 (B, C).

424

425

426 **STAR METHODS**

427 **KEY RESOURCE TABLE**

| REAGENT or RESOURCE                                                                  | SOURCE                    | IDENTIFIER        |
|--------------------------------------------------------------------------------------|---------------------------|-------------------|
| <b>Antibodies</b>                                                                    |                           |                   |
| LAMP1 (D4O1S) Mouse mAb                                                              | Cell Signaling Technology | 15665S            |
| Anti-IFIT3/P60 antibody [OT11G1]                                                     | Abcam                     | ab118045          |
| IFITM3 Antibody                                                                      | Proteintech               | 11714-1-AP        |
| Cathepsin D Monoclonal Antibody (CTD-19)                                             | ThermoFisher              | MA1-26773         |
| Anti-GM130 antibody [EP892Y] - cis-Golgi Marker                                      | Abcam                     | ab52649           |
| $\beta$ -Actin Antibody (AC-15)                                                      | Santa Cruz                | sc-69879          |
| PE/Cy7 anti-mouse CD45.2                                                             | Biolegend                 | 109829            |
| FITC anti-mouse CD45.1                                                               | Biolegend                 | 110706            |
| Human/Mouse E-Cadherin Antibody                                                      | R&D                       | AF748             |
| Anti-Rabbit IgG (whole molecule)–Peroxidase antibody                                 | Sigma                     | A4914             |
| Goat anti-Mouse IgG (H+L) Secondary Antibody, HRP                                    | ThermoFisher              | 31430             |
| Rabbit anti-Goat IgG (H+L) Cross-Adsorbed Secondary Antibody, HRP                    | Invitrogen                | R-21459           |
| Donkey anti-Goat IgG (H+L) Cross-Adsorbed Secondary Antibody, Alexa Fluor 568        | Invitrogen                | A-11057           |
| Goat anti-Rabbit IgG (H+L) Highly Cross-Adsorbed Secondary Antibody, Alexa Fluor 488 | Invitrogen                | A-11034           |
| <b>Bacterial Strains</b>                                                             |                           |                   |
| Salmonella Typhimurium SL1344                                                        | Dr. Dirk Bumann           |                   |
| Salmonella Typhimurium SL1344 $\Delta$ prgH                                          | This study                |                   |
| Salmonella Typhimurium SL1344 $\Delta$ ssaV                                          | This study                |                   |
| Salmonella Typhimurium SL1344-eGFP                                                   | This study                |                   |
| Salmonella Typhimurium SL1344-mCherry                                                | This study                |                   |
| Salmonella Typhimurium SL1344-P <sub>sifB</sub> -GFP                                 | Dr. Dirk Bumann           |                   |
| Salmonella Typhimurium SL1344-mCherry-P <sub>sifB</sub> -GFP                         | This study                |                   |
| One Shot Stbl3 Chemically Competent E. coli                                          | Thermo Fisher Scientific  | Cat No.C737303    |
| <b>Chemicals and Recombinant Proteins</b>                                            |                           |                   |
| IFN $\beta$                                                                          | Peprtech                  | Cat No. 300-02BC  |
| pyridine-6                                                                           | BioVision                 | Cat No. 2534      |
| Ruxolitinib (NCB018424)                                                              | Selleckchem               | Cat No.S1378      |
| Polybrene,                                                                           | Sigma                     | Cat No. TR-1003-G |
| Trizol                                                                               | Invitrogen                | Cat No. 15596018  |

|                                                      |                                                 |                             |
|------------------------------------------------------|-------------------------------------------------|-----------------------------|
| SuperScript III reverse transcriptase                | Invitrogen                                      | Cat No. 18080085            |
| Roche 2xSYBR master mix                              | Roche                                           | Cat No.<br>04707516001      |
| BfA1                                                 | SantaCruz                                       | Cat No. sc-201550           |
| Critical Commercial Assays                           |                                                 |                             |
| Blood and Cell Culture DNA MaxiKit                   | QIAGEN                                          | Cat No. 13362               |
| TransIT-LT1                                          | Mirus                                           | Cat No. MIR230              |
| QIAquick Gel Extraction Kit                          | Qiagen                                          | Cat No. 28704               |
| LDH assay kit                                        | Promega                                         | Cat No. G1780               |
| FITC Annexin V Apoptosis Detection kit               | BioLegend                                       | Cat No. 640922              |
| Lipofectamine 3000                                   | ThermoFisher                                    | Cat No. L3000008            |
| Lysotracker                                          | ThermoFisher                                    | Cat No. L7528               |
| Lysosensor                                           | Thermofisher                                    | Cat No. L7545               |
| fluorogenic peptide substrate of cathepsin D         | Biovision                                       | Cat No. K143                |
| Dextran 568                                          | ThermoFisher                                    | Cat No. D22912              |
| DQ-Red BSA                                           | ThermoFisher                                    | Cat No. D12050              |
| 10% Tris-Glycine gels                                | ThermoFisher                                    | Cat No.<br>XP00102BOX       |
| nitrocellulose membranes                             | Invitrogen                                      | Cat No. IB23002             |
| SuperSignal West Pico Enhanced Chemiluminescence kit | ThermoFisher                                    | Cat No. 34577               |
| PureLink Micro-to-Midi total RNA purification system | Invitrogen                                      | Cat No. 12183               |
| Ambion Turbo DNA-free DNase                          | Invitrogen                                      | Cat No. AM1907              |
| TUNEL kit                                            | ThermoFisher                                    | Cat No. A23210              |
| Experimental Models: Cell Lines                      |                                                 |                             |
| HeLa                                                 | ATCC                                            | CRM-CCL-2, female           |
| HEK293T                                              | ATCC                                            | CRL-3216, female            |
| HT29                                                 | ATCC                                            | HTB-38, female              |
| THP-1                                                | ATCC                                            | TIB-202, male               |
| Primary human small intestine organoids              | Harvard Digestive Diseases Center Organoid Core | Gift from Dr. David Breault |
| Experimental Models: Organisms/Strains               |                                                 |                             |
| Mouse: C57BL/6J B6(Cg)-Irfnar1tm1.2Ees/J             | The Jackson Laboratory                          | Stock No: 028288            |
| Mouse: B6.SJL-Ptprca Pepcb/BoyJ                      | The Jackson Laboratory                          | Stock No: 002014            |
| Oligonucleotides                                     |                                                 |                             |
| qPCR primers, see Table S3                           |                                                 |                             |
| CRISPR gene KO primers, see Table S4                 |                                                 |                             |

| Recombinant DNA              |                          |                                                                                               |
|------------------------------|--------------------------|-----------------------------------------------------------------------------------------------|
| lentiGuide-Puro              | Addgene                  | 52963                                                                                         |
| psPAX2                       | Addgene                  | 12260                                                                                         |
| pMD2.G                       | Addgene                  | 12259                                                                                         |
| pLJC5-LAMP1-RFP-3xHA         | Addgene                  | 102932                                                                                        |
| pHR-FKBP:mCherry-Rab5a       | Addgene                  | 72901                                                                                         |
| pHR-FKBP:mCherry-Rab7a       | Addgene                  | 72903                                                                                         |
| LAMP1-mGFP                   | Addgene                  | 34831                                                                                         |
| pLJC5-Tmem192-3xHA           | Addgene                  | 102930                                                                                        |
| mAG-GAL3                     | Addgene                  | 62734                                                                                         |
| Software and Algorithms      |                          |                                                                                               |
| Primer3                      | Untergasser et al., 2012 | <a href="http://primer3.ut.ee/">http://primer3.ut.ee/</a>                                     |
| ImageJ                       | NIH                      | <a href="https://imagej.nih.gov/ij/download.html">https://imagej.nih.gov/ij/download.html</a> |
| FlowJo 10.2                  | FlowJo                   | <a href="https://www.flowjo.com/solutions/flowjo">https://www.flowjo.com/solutions/flowjo</a> |
| GraphPad Prism               | GraphPad Software        | <a href="https://www.graphpad.com">https://www.graphpad.com</a>                               |
| Gene set enrichment Analysis | Broad Institute          | <a href="http://www.broadinstitute.org/gsea">http://www.broadinstitute.org/gsea</a>           |
| DAVID analysis               | NIAID/NIH                | <a href="http://david.abcc.ncifcrf.gov">http://david.abcc.ncifcrf.gov</a>                     |

428

## 429 CONTACT FOR REAGENT AND RESOURCE SHARING

430 Further information and requests for resources and reagents should be directed to and will be

431 fulfilled by the Lead Contact, Matthew K Waldor ([mwaldor@research.bwh.harvard.edu](mailto:mwaldor@research.bwh.harvard.edu))

432

## 433 EXPERIMENTAL MODEL AND SUBJECT DETAILS

434

### 435 Bacterial strains, plasmids, and antibodies

436 Strains, plasmids, oligonucleotides and antibodies used in this study are listed in key resources



437 table and table S3, 4. *Escherichia coli* K-12 DH5 $\alpha$   $\lambda$  pir was used for cloning procedures and  
438 plasmid propagation. *S. typhimurium* strain SL1344 and its  $\Delta$ SPI-1 and  $\Delta$ SPI-2 derivatives were  
439 cultured in Luria-Bertani (LB) medium or on LB agar plates at 37°C supplemented with  
440 streptomycin (100 $\mu$ g/ml). The SPI-1 (*prgH*) and SPI-2 (*ssaV*) genes were deleted from  
441 wild-type (WT) SL1344 with the lambda red recombination system (Datsenko and Wanner,  
442 2000). This approach was also used to introduce the GFP and mCherry-coding sequence with a  
443 constitutive promoter ( $P_{rpsM}$ ) into the *putP-putA* locus (Hautefort et al., 2003).

444

#### 445 **Cell lines**

446 HeLa (ATCC, Cat No. CRM-CCL-2, female) and HEK293T (ATCC, Cat No. CRL-3216,  
447 female) cells were cultured in Dulbecco's modified Eagle's medium (DMEM; ThermoFisher,  
448 Cat No. 11965) supplemented with 10% fetal bovine serum (FBS; Gibco, Cat No. 16140-071).  
449 HT29 (ATCC, Cat No. HTB-38, female) cells were cultured in McCoy's 5A modified medium  
450 (Thermo Fisher, Cat No. 30-2007) supplemented with 10% FBS. THP-1 (ATCC, Cat No.  
451 TIB-202, male) cells were cultured in RPMI-1640 medium (Lonza, Cat No. 12-167F) with 10%  
452 non-heat inactivated FBS (GeminiBio, Cat NO. 100-500) and supplemented with HEPES  
453 (Lonza, Cat No. 17-737E), 2-Mercaptoethanol (Invitrogen, Cat No. 21985023) and  
454 L-Glutamine (Lonza, Cat No. 17-605E). All cells were cultured at 37°C in a 5% CO<sub>2</sub> incubator.

455

#### 456 **Infection of organoids derived from human small intestine**

457 Primary human small intestine organoids (enteroids) were kindly provided by Dr. David Breault  
458 at the Harvard Digestive Diseases Center (HDDC) Organoid Core. Enteroids were cultured in  
459 the following medium: advanced DMEM/F12 (Gibco, Cat No.12634-028) supplemented with  
460 L-WRN conditioned medium (ATCC CRL-3276; HDDC Organoids Core), HEPES (10mM, pH  
461 7.4), GlutaMax (Gibco, Cat No.35050-061), B<sub>27</sub> (Gibco, Cat No.12587010), N2 (Gibco, Cat  
462 No.17502-048), 1mM N-acetyl-L-cysteine (Sigma, Cat No.A8199), 10mM nicotinamide  
463 (Sigma, Cat No.N0636), 5μM A83-01 (Sigma, Cat No.SML0788), 10μM SB202190 (Sigma,  
464 Cat No.S7067), 50ng/ml murine EGF (Peprotech, Cat No.315-09), 10nM gastrin (Sigma, Cat  
465 No.G9145), and 10μM Y-27632 (Sigma, Cat No.Y0503). For *Stm* infection, approximately 100  
466 enteroids were seeded in 50μl Matrigel (Corning, Cat No.356231) in each well of a 24-well  
467 plate. Three to four days after seeding, enteroids were either mock treated, or primed with either  
468 10ng/ml IFNβ or 0.5 μM pyridine-6 for 16 hours. Enteroids were then released from Matrigel  
469 by incubation in 500μl Cell Recovery Solution (Corning, Cat No.354253) for 30 mins on ice.  
470 Resuspended enteroids were pipetted up and down 50 times with a P1000 pipette and then  
471 transferred to a new 24-well plate. Each well was infected with approximately 3×10<sup>7</sup> *Stm*. The  
472 plate was centrifuged for 5 mins at 300× g before it was placed in a 37°C incubator for 30 mins.  
473 After infection, enteroids were transferred to microcentrifuge tubes, spundown, mixed with  
474 50μl Matrigel per tube/sample, and seeded into a new 24-well plate. After Matrigel  
475 solidification at 37°C, 500μl full enteroid media containing 50μg/ml gentamicin was added to  
476 each well at 10ng/ml IFNβ or 0.5μM pyridine-6 was added to the corresponding primed  
477 samples. At 20 hpi, propidium iodide (Invitrogen, Cat No.V13241) was used to stain the

478 enteroids before imaging. To quantitatively measure cell death, the media from each  
479 well/sample was also assayed for LDH activity as described above. LDH release values of  
480 mock treated samples were set at 1 for normalization.

481

#### 482 **Bone marrow chimera mice**

483 C57BL/6 and *Ifnar1*<sup>-/-</sup> mice were purchased from The Jackson Laboratory (Bar Harbor, ME,  
484 USA) and were maintained on a 12-hour light/dark cycle and a standard chow diet at the  
485 Harvard Institute of Medicine specific pathogen-free (SPF) animal facility (Boston, MA, USA).  
486 Animal experiments were performed according to guidelines from the Center for Animal  
487 Resources and Comparative Medicine at Harvard Medical School. All protocols and  
488 experimental plans were approved by the Brigham and Women's Hospital Institutional Animal  
489 Care and Use Committee (Protocol #2016N000416). Littermate control male and female mice  
490 were randomly assigned to each group and experiments were performed blinded with respect to  
491 treatment. For bone marrow chimeras, recipient mice were irradiated two times with 600 rad  
492 1□day before injection of bone marrow from WT or *Ifnar1*<sup>-/-</sup> mice. Bone marrow was extracted  
493 from femurs of donor mice by flushing with PBS and then washed once in PBS; 1× 10<sup>6</sup> cells  
494 were injected into the tail vein of recipient mice. Mice were monitored for 4 weeks, at which  
495 point engraftment was evaluated by flow cytometry.

496

#### 497 **Infection of chimeric mice**

498 20μg poly (I:C) (Sigma, Cat No. P1530) was given intraperitoneally to chimeric mice one day

499 before *Stm* infection and every other day for a total of 3 doses to stimulate IFN production.  
500 Food was withdrawn for 4 hours before infection. *Stm* inocula were prepared as described  
501 above. Mice were infected orogastrically with  $5 \times 10^8$  *Stm* in 100 $\mu$ l PBS. Food was returned  
502 to the cages 2hpi. Infected mice were sacrificed 5 days after infection. Tissue samples of the  
503 small intestine, spleen and liver were collected for histological analysis and enumeration of  
504 colony-forming units (CFU). CFU were quantified by serial-dilution plating of homogenized  
505 tissue samples on LB plates containing 100 $\mu$ g/ml streptomycin.

506

## 507 **METHOD DETAILS**

508

### 509 **Pharmacologic inhibitors and IFN $\beta$ priming**

510 JAK inhibitors pyridine-6 (BioVision, Cat No. 2534) and ruxolitinib (NCB018424)  
511 (Selleckchem, Cat No.S1378) were used at 0.5 $\mu$ M. IFN $\beta$  (Peprotech, Cat No. 300-02BC) was  
512 used at 10ng/ml for cell priming. Drug-treated cells were primed for 16 hours (unless otherwise  
513 indicated) before *Stm* infection.

514

### 515 ***Stm* infections**

516 All tissue culture infections were done according to the following procedure unless otherwise  
517 indicated. WT and mutant *Stm* were grown for ~16 hours at 37 $^{\circ}$ C with shaking and then  
518 sub-cultured (1:33) in LB without antibiotics for 3 hours until the cultures reached an OD<sub>600</sub> of  
519 0.8. To prepare the inoculum, cultures were first pelleted at 5,000 $\times$  g for 5 min. The pellets were

520 resuspended in DMEM without FBS, and an appropriate volume of bacterial solution was  
521 added to cells to reach a multiplicity of infection (MOI) of 100 bacteria per eukaryotic cell. The  
522 cells were then incubated with bacteria for 30 min at 37°C with 5% CO<sub>2</sub>. Extracellular bacteria  
523 were removed by extensive washing with phosphate-buffered saline (PBS; Gibco, Cat No.  
524 14190250) and addition of 50µg/ml gentamicin to the medium. At 2 hours post infection (hpi),  
525 the gentamicin concentration was decreased to 5µg/ml.

526

### 527 **CRISPR/Cas9 *Stm* infection screen**

528 HT29-Cas9 CRISPR libraries were constructed as described previously (Blondel et al., 2016)  
529 using the Avana sgRNA library, which contains four different sgRNAs targeting each human  
530 protein-coding gene (Doench et al., 2016). For each library, two sets of four T225 flasks  
531 (Corning, Cat No. 14-826-80) were seeded with  $15 \times 10^6$  cells per flask and then incubated for  
532 48 hours. At the time of the screen, there were  $\sim 150 \times 10^6$  cells per experimental condition,  
533 corresponding to  $\sim 2,000 \times$  coverage per sgRNA. Cells were at  $\sim 70\%$  confluence at the time of  
534 infection. The infection was done as described above with minor modifications. Briefly, HT29  
535 libraries were infected with WT *Stm* at an MOI of 300 for 30 min. After infection, the libraries  
536 were expanded in McCoy's 5A + FBS containing 5µg/ml gentamicin, to both permit  
537 intracellular bacterial cytotoxicity and minimize the intracellular gentamicin concentration to  
538 allow *Stm* invasion during the next round of infection. Flasks were checked daily to monitor  
539 recovery of survivor cells; when 70% confluency was achieved, cells were trypsinized, pooled,  
540 and reseeded for the next round of infection. In total, four rounds of infection were conducted.

541 Surviving cells from the last round of infection were used for preparation of genomic DNA.

542

### 543 **Genomic DNA preparation, sequencing, and analyses of screen results**

544 Genomic DNA was obtained from  $75 \times 10^6$  cells after positive selection, as well as from input  
545 cells, using the Blood and Cell Culture DNA MaxiKit (QIAGEN, Cat No. 13362). sgRNA  
546 sequences was amplified by PCR as described (Doench et al., 2016). The read counts were first  
547 normalized to reads per million within each condition by the following formula: reads per  
548 sgRNA / total reads per condition  $\times 10^6$ . Reads per million were then  $\log_2$ -transformed by first  
549 adding 1 to all values, in order calculate the log of sgRNAs with zero reads. The  $\log_2$   
550 fold-change of each sgRNA was then determined relative to the input sample for each  
551 biological replicate. MAGeCK analysis for genome-scale CRISPR-Cas9 knockout screens was  
552 used to evaluate the rank and statistical significance of perturbations from the ranked list (Li et  
553 al., 2014) and enriched pathways were determined using ClueGo (Bindea et al., 2009).

554

### 555 **Lentivirus preparation and transductions**

556 The Galectin 3, Rab5, Rab7, LAMP1, and LC3B lentiviral expression plasmids used in the  
557 study are listed in Table S4. Lentiviral packaging plasmids psPAX2 and pVSV-G, and the  
558 corresponding cargo plasmid were transfected into 293T cells with the TransIT-LT1 transfection  
559 reagent (Mirus, Cat No. MIR230). 48 hours following transfection, 293T culture supernatants  
560 were harvested, passed through a  $0.45\mu\text{m}$  pore filter, and added to target cells that were grown  
561 to 70-80% confluency in 6-well plates. Polybrene (Sigma, Cat No. TR-1003-G) ( $8\mu\text{g/ml}$ ) was

562 added and the 6-well plates were spun at 1000×g for 2 hours at 30°C, after which cells were  
563 returned to 37°C. The infections were repeated the next day with supernatants from 72  
564 hour-transfected 293T cultures.

565

### 566 **Construction of cell lines with targeted gene disruptions**

567 The sgRNA sequences used for construction of targeted HT29-Cas9 and HeLa-Cas9 mutant cell  
568 lines are listed in Table S4. All sgRNA oligonucleotides were obtained from Integrated DNA  
569 Technologies (IDT) and cloned into the pLentiGuide-Puro plasmid. Briefly, 5µg of plasmid  
570 pLentiGuide-Puro was digested with BsmBI (Fermentas, Cat No. ER0451) and purified using  
571 the QIAquick Gel Extraction Kit (Qiagen, Cat No. 28704). Each pair of oligos was annealed  
572 and phosphorylated with T4 PNK (NEB, Cat No. M0201S) in the presence of 10× T4 DNA  
573 ligase buffer in a thermocycler with the following parameters: i) incubation for 30 minutes at  
574 37°C, ii) incubation at 95°C for 5 min with a ramp down to 25°C at 5°C per minute. Oligos  
575 were then diluted 1:200, and 1µl of the diluted oligo mixture was ligated with 50ng of BsmBI  
576 digested plasmid. Ligations were transformed into the STBL3 *Escherichia coli* strain (Thermo  
577 Fisher, Cat No. C7373-03) and positive clones were identified by Sanger sequencing (Genewiz).  
578 Lentiviral transduction of sgRNAs cloned into pLentiGuide-Puro into HT29-Cas9 and  
579 HeLa-Cas9 cells was performed as described above. Targeted gene KO cell lines were selected  
580 by puromycin (1µg/ml) for 10 days. HT29 KO cells were isolated as single clones while HeLa  
581 cells were CRISPR KO pools after drug selection.

582

583 **Cell survival assays**

584 For cell survival assays,  $5 \times 10^4$  HT29 cells were seeded into 96-well plates and primed with or  
585 without drugs in McCoy's 5A medium supplemented with 10% FBS. HT29 cells were infected  
586 with *Stms* strains at an MOI of 100 as described above. Cell survival analysis was performed  
587 using an LDH assay (Promega, Cat No. G1780) according to the manufacturer's protocol at 4  
588 and 20 hpi.

589

590 ***Stm* invasion assays**

591 mCherry-or GFP-tagged *Stm* were used in all flow cytometry and immunofluorescence  
592 experiments. *Stm* infections were performed as described above with varying MOIs. At 4hpi,  
593 suspended and attached cells were collected, resuspended in PBS, and immediately analyzed  
594 with a LSR II (BD Bioscience) or SH800 (Sony) flow cytometer. Data were processed with  
595 FlowJo software (v10.6.1).

596

597 **Annexin V staining and FACS analysis**

598 Cell death was detected with the FITC Annexin V Apoptosis Detection kit (BioLegend, Cat No.  
599 640922). Infections were performed as described above with mCherry-*Stm* at an MOI of 100.  
600 20 hpi suspended and attached cells were collected, resuspended in 100 $\mu$ l of Annexin V binding  
601 buffer at  $1 \times 10^7$  cells/ml and mixed with 5 $\mu$ l of FITC-conjugated Annexin V. After incubation at  
602 room temperature (RT) for 15 min in the dark, 400 $\mu$ l of Annexin V binding buffer was added  
603 and stained cells were immediately analyzed by flow cytometry as described above.



604

### 605 **Immunofluorescence microscopy of tissue cultured cells**

606 HeLa cells were seeded in 12-well plates on 18 mm glass coverslips or 6-well chambers  
607 (Mat-TEK, Cat No.P06G-1.5-10-F). Cells were transiently transfected with LAMP1-GFP  
608 expressing plasmid mixed with Lipofectamine 3000 (ThermoFisher, Cat No. L3000008)  
609 according to the manufacturer's instructions. 24 hours post-transfection cells were primed with  
610 or without 10ng/ml IFN $\beta$  for 16 hours. The cells were then stained with 75nM LysoTracker  
611 (ThermoFisher, Cat No. L7528) for 15 min and then fixed with 2% PFA for 20 min at RT. The  
612 samples were washed with PBS three times, and stained with fluorescent phalloidin (1:1000)  
613 and 4,6-diamidino-2-phenylindole (DAPI, 1  $\mu$ g/ml) to label actin filaments and nuclei,  
614 respectively. For experiments with LAMP1-RFP, Rab5-RFP, Rab7-RFP, Gal3-GFP, and  
615 eGFP-LC3B cell lines, cells were seeded in 6-well chambers and primed with 10ng/ml IFN $\beta$   
616 for 16 hours before infection with fluorescently-labeled *Stm* at an MOI 50. Live cells were  
617 analyzed at 2 hpi by confocal microscopy to detect localization of Gal3 and *Stm*.

618

### 619 **Quantification of lysosome distribution**

620 Lysosome distribution was analyzed as described (Li et al., 2016); the area occupied by nuclei  
621 was excluded from analyses. Average LAMP1 intensities were measured for the area within  
622 5 $\mu$ m of the nucleus ( $I_{\text{perinuclear}}$ ), and the area >10 $\mu$ m from the nucleus ( $I_{\text{peripheral}}$ ). The average  
623 intensities were calculated and normalized to cell areas. The perinuclear index was defined as  
624  $I_{\text{perinuclear}} / I_{\text{peripheral}}$ . Quantifications were carried out on 10 cells per group with ImageJ.

625

### 626 **Measurement of lysosome acidity**

627 Cells with no treatment or with either 10ng/ml IFN $\beta$  or 5nM BfA1 (SantaCruz, Cat No.  
628 sc-201550) treatment for 16 hours were stained with 75nM LysoTracker or LysoSensor  
629 (ThermoFisher, Cat No. L7545) for 15 min and washed with PBS. The fluorescence intensity of  
630 the stained cells was determined by flow cytometry.

631

### 632 **Cathepsin D activity assay**

633 HeLa cells were seeded in 96-well plates with or without 10ng/ml IFN $\beta$  priming for 16 hours. A  
634 fluorogenic peptide substrate of cathepsin D, Mca-P-L-G-L-Dpa-A-R-NH<sub>2</sub> (Biovision, Cat No.  
635 K143), was added to the cells to a final concentration of 200 $\mu$ M for 2 hours. The fluorescence  
636 intensity of each well was measured with a fluorescence plate reader. Each sample was assayed  
637 in triplicate and normalized to a standard curve.

638

### 639 **Endocytosis and lysosome function assays**

640 HeLa cells were seeded in 24-well plates with or without 10ng/ml IFN $\beta$  priming. Cells were  
641 treated with either 50 $\mu$ g/ml Dextran 568 (ThermoFisher, Cat No. D22912) or 25 $\mu$ g/ml DQ-Red  
642 BSA (ThermoFisher, Cat No. D12050) for 2 hours in growth medium. Then, cells were washed  
643 with PBS and trypsinized for fluorescence quantification by flow cytometry.

644

### 645 **Lysosome immunopurification (LysoIP)**

646 LysoIP was performed largely as described (Abu-Remaileh et al., 2017). Briefly,  
647 pLJC5-3×HA-TMEM192 was used to introduce a lysosomal tag protein in WT and *Ifnar2* KO  
648 HeLa cells. 15 million cells were used for each replicate. Cells were rinsed twice with  
649 pre-chilled PBS and then scraped in 1ml of PBS containing protease and phosphatase inhibitors  
650 and pelleted at 100×g for 2 min at 4°C. Cells were resuspended in 950µl of the same buffer, and  
651 25µl (equivalent to 2.5% of the total number cells) was reserved for further processing to  
652 generate the whole-cell sample. The remaining cells were gently homogenized with 25 strokes  
653 of a 2ml Dounce-type homogenizer. The homogenate was then centrifuged at 100×g for 2 min  
654 at 4°C to pellet the cell debris and intact cells, while cellular organelles including lysosomes  
655 remained in the supernatant. The supernatant was incubated with 150µl of anti-HA magnetic  
656 beads preequilibrated with PBS on a rotator shaker for 3 min. Immunoprecipitates were then  
657 gently washed three times with PBS on a DynaMag Spin Magnet. Beads with bound lysosomes  
658 were resuspended in 100µl pre-chilled 1% Triton-X lysis buffer to extract proteins. After 10  
659 min incubation on ice, the beads were removed with the magnet. 5µl of each sample were  
660 subjected to 12.5%-acrylamide SDS-PAGE and immunodetected using antibody listed in Table  
661 S6, while the remainder was submitted to the Thermo Fisher Center for Multiplexed Proteomics  
662 of Harvard Medical School (Boston, MA, USA) for Isobaric Tandem Mass Tag (TMT)-based  
663 quantitative proteomics.

664

#### 665 **Immunoblot analyses**

666 Mammalian cell lysates were prepared in radioimmuno-precipitation assay (RIPA) buffer

667 supplemented with 1 tablet of EDTA-free protease inhibitor (Roche, Cat No. C762Q77) per  
668 25ml buffer. Lysates were kept at 4°C for 30 min and then clarified by centrifugation in a  
669 microcentrifuge at 13,000 rpm at 4°C for 10 min. Proteins were denatured by the addition of  
670 SDS sample buffer and boiling for 5 min. Proteins were separated by electrophoresis in 10%  
671 Tris-Glycine gels (ThermoFisher, Cat No. XP00102BOX), and then transferred onto  
672 nitrocellulose membranes (Invitrogen, Cat No. IB23002). The antibodies and dilutions used are  
673 listed in Table S6. Blots were developed with the SuperSignal West Pico Enhanced  
674 Chemiluminescence kit (ThermoFisher, Cat No. 34577), and imaged with a Chemidoc  
675 (Bio-Rad).

676

#### 677 **qRT-PCR quantification of *Stm* virulence gene expression**

678 HeLa cells were seeded at  $1.5 \times 10^6$  cells per 6-well plates. After drug-treatment for 16 hours,  
679 cells were infected with *Stm* at an MOI of 50 as described above. Cells were washed with PBS  
680 and lysed in Trizol (Invitrogen, Cat No. 15596018) at 1 and 4 hpi. RNA was purified with the  
681 PureLink Micro-to-Midi total RNA purification system (Invitrogen, Cat No. 12183) according  
682 to the manufacturer's instructions. RNA samples were treated for residual DNA contamination  
683 using Ambion Turbo DNA-free DNase (Invitrogen, Cat No. AM1907). Purified RNA was  
684 quantified on a Nanodrop 1000 (Thermo Scientific). RNA was reverse transcribed for  
685 quantitative RT-PCR (qRT-PCR) experiments by adding 10µg of total RNA to a mixture  
686 containing random hexamers (Life Technologies), 0.01M dithiothreitol, 25 mM dNTPs  
687 (Thermo Scientific, Cat No. R0191), reaction buffer and 200 units of SuperScript III reverse

688 transcriptase (Invitrogen, Cat No. 18080085). cDNA was diluted 1:50 in dH<sub>2</sub>O and mixed with  
689 an equal volume of target-specific primers and Roche 2×SYBR master mix (Roche, Cat  
690 No.04707516001). Plates were centrifuged at 1000 rpm for 1 min and stored at 4°C in the dark  
691 until ready for use. Primer pairs were designed to minimize secondary structures, a length of  
692 ~20-nucleotides and a melting temperature of 60°C using the primer design software Primer 3.  
693 Primer sequences are listed in Table S3. For data normalization, quadruplicate C<sub>t</sub> values for  
694 each sample were averaged and normalized to C<sub>t</sub> values of the control gene *rpoB*. The relative  
695 gene expression level of *Stm* in infection conditions was normalized to LB-cultured *Stm*.

696

#### 697 **Flow cytometric analysis of *Stm* virulence gene expression**

698 HeLa cells were infected with mCherry-and *sifB*-GFP-expressing-*Stm* as described above. Cell  
699 lysis was performed 4 hpi by washing three times with PBS and subsequent incubation for 10  
700 min with PBS containing 0.1% Triton X-100. Cell lysates were then analyzed by flow  
701 cytometry. *Stm* were first identified by gating on the mCherry signal and *sifB* expression was  
702 quantified by gating on the mCherry+/GFP+ population. LB cultured *Stm* served as negative  
703 control.

704

#### 705 **Gentamicin protection assay**

706 Gentamicin protection assays were carried out as described (Knodler et al., 2014). Briefly,  
707 HeLa cells in 96-well plates were infected in triplicate with *Stm* at an MOI of 50. Cells were  
708 washed three times with PBS and incubated in medium containing 100µg/ml gentamicin for 30

709 min to eliminate extracellular bacteria. Then, media with either 10, 100 or 400µg/ml gentamicin  
710 was applied to the cells. Cells were lysed 2hpi by washing three times with PBS and subsequent  
711 incubation for 10 min with PBS containing 0.1 % Triton X-100. Colony forming units (CFUs)  
712 were enumerated by plating serial dilutions of the lysates onto LB plates with 100µg/ml  
713 streptomycin. Data was normalized to the CFU of WT HeLa cells at gentamicin 10.

714

### 715 **Histology and tissue immunofluorescence**

716 Formalin-fixed, paraffin-embedded distal small intestinal samples sections of 4µm thickness  
717 were mounted on glass slides and stained with hematoxylin and eosin. Histology score was  
718 evaluated as described (Erben et al., 2014). For immunofluorescence analysis, distal small  
719 intestinal samples were collected and flushed with PBS and fixed in 4% paraformaldehyde  
720 (PFA) overnight at 4°C followed by washing with PBS. Tissues were embedded in Optimal  
721 Cutting Temperature Compound (Tissue-Tek) and stored at -80°C before sectioning on a  
722 CM1860 UV cryostat (Leica). 6µm-thick slides were stained with TUNEL (ThermoFisher, Cat  
723 No. A23210) according to the manufacturer's instructions and then incubated with  
724 anti-E-cadherin antibodies at 4°C overnight at a 1:200 in PBS. The next day, AF568-conjugated  
725 secondary antibody, diluted at 1:500, was applied to the slides for 1 hour. Nuclei were stained  
726 with DAPI at RT for 5 min in the dark. Samples were imaged with an Eclipse Ti confocal  
727 microscope with a 20× objective (Nikon).

728

### 729 **QUANTIFICATION AND STATISTICAL ANALYSIS**

730 Statistical analyses were carried out using the two-tailed Student's *t* test or one-way analysis of  
731 variance (ANOVA) with Dunnet's post-correction on GraphPad Prism5.

732

### 733 **DATA AND CODE AVAILABILITY**

734 Original data for results of CRISPR screening is in Table S1, and original data for mass  
735 spectrometry of lysosome proteomic is in Table S2.

736

### 737 **Supplementary items**

738 Table S1: CRISPR/Cas9 screening results, related to figure 1

739 Table S2: Mass spectrometry of lysosome proteomic, related to figure 3

740 Table S3: qPCR primers

741 Table S4: CRISPR KO primers

742

743

## 744 REFERENCES

- 745 Abu-Remaileh, M., Wyant, G.A., Kim, C., Laqtom, N.N., Abbasi, M., Chan, S.H., Freinkman, E., and Sabatini, D.M.  
746 (2017). Lysosomal metabolomics reveals V-ATPase- and mTOR-dependent regulation of amino acid efflux from  
747 lysosomes. *Science* 358, 807-813.
- 748 Amini-Bavil-Olyaei, S., Choi, Y.J., Lee, J.H., Shi, M., Huang, I.C., Farzan, M., and Jung, J.U. (2013). The antiviral  
749 effector IFITM3 disrupts intracellular cholesterol homeostasis to block viral entry. *Cell host & microbe* 13,  
750 452-464.
- 751 Auerbuch, V., Brockstedt, D.G., Meyer-Morse, N., O'Riordan, M., and Portnoy, D.A. (2004). Mice lacking the type I  
752 interferon receptor are resistant to *Listeria monocytogenes*. *J Exp Med* 200, 527-533.
- 753 Bindea, G., Mlecnik, B., Hackl, H., Charoentong, P., Tosolini, M., Kirilovsky, A., Fridman, W.H., Pages, F., Trajanoski,  
754 Z., and Galon, J. (2009). ClueGO: a Cytoscape plug-in to decipher functionally grouped gene ontology and pathway  
755 annotation networks. *Bioinformatics* 25, 1091-1093.
- 756 Blondel, C.J., Park, J.S., Hubbard, T.P., Pacheco, A.R., Kuehl, C.J., Walsh, M.J., Davis, B.M., Gewurz, B.E., Doench,  
757 J.G., and Waldor, M.K. (2016). CRISPR/Cas9 Screens Reveal Requirements for Host Cell Sulfation and Fucosylation  
758 in Bacterial Type III Secretion System-Mediated Cytotoxicity. *Cell host & microbe* 20, 226-237.
- 759 Boxx, G.M., and Cheng, G. (2016). The Roles of Type I Interferon in Bacterial Infection. *Cell host & microbe* 19,  
760 760-769.
- 761 Butor, C., Griffiths, G., Aronson, N.N., Jr., and Varki, A. (1995). Co-localization of hydrolytic enzymes with widely  
762 disparate pH optima: implications for the regulation of lysosomal pH. *J Cell Sci* 108 ( Pt 6), 2213-2219.
- 763 Chakraborty, S., Mizusaki, H., and Kenney, L.J. (2015). A FRET-based DNA biosensor tracks OmpR-dependent  
764 acidification of *Salmonella* during macrophage infection. *PLoS biology* 13, e1002116.
- 765 Datsenko, K.A., and Wanner, B.L. (2000). One-step inactivation of chromosomal genes in *Escherichia coli* K-12  
766 using PCR products. *Proc Natl Acad Sci U S A* 97, 6640-6645.
- 767 Desjardins, M., Celis, J.E., van Meer, G., Dieplinger, H., Jahraus, A., Griffiths, G., and Huber, L.A. (1994). Molecular  
768 characterization of phagosomes. *J Biol Chem* 269, 32194-32200.
- 769 Doench, J.G., Fusi, N., Sullender, M., Hegde, M., Vaimberg, E.W., Donovan, K.F., Smith, I., Tothova, Z., Wilen, C.,  
770 Orchard, R., *et al.* (2016). Optimized sgRNA design to maximize activity and minimize off-target effects of  
771 CRISPR-Cas9. *Nat Biotechnol* 34, 184-191.
- 772 Dorhoi, A., Yermeev, V., Nouailles, G., Weiner, J., 3rd, Jorg, S., Heinemann, E., Oberbeck-Muller, D., Knaul, J.K.,  
773 Vogelzang, A., Reece, S.T., *et al.* (2014). Type I IFN signaling triggers immunopathology in tuberculosis-susceptible  
774 mice by modulating lung phagocyte dynamics. *Eur J Immunol* 44, 2380-2393.
- 775 Erben, U., Loddenkemper, C., Doerfel, K., Spieckermann, S., Haller, D., Heimesaat, M.M., Zeitz, M., Siegmund, B.,  
776 and Kuhl, A.A. (2014). A guide to histomorphological evaluation of intestinal inflammation in mouse models. *Int J*  
777 *Clin Exp Pathol* 7, 4557-4576.
- 778 Galan, J.E., Lara-Tejero, M., Marlovits, T.C., and Wagner, S. (2014). Bacterial type III secretion systems: specialized  
779 nanomachines for protein delivery into target cells. *Annual review of microbiology* 68, 415-438.
- 780 Garmendia, J., Beuzon, C.R., Ruiz-Albert, J., and Holden, D.W. (2003). The roles of SsrA-SsrB and OmpR-EnvZ in the  
781 regulation of genes encoding the *Salmonella typhimurium* SPI-2 type III secretion system. *Microbiology* 149,  
782 2385-2396.
- 783 Gunn, J.S., Alpuche-Aranda, C.M., Loomis, W.P., Belden, W.J., and Miller, S.I. (1995). Characterization of the



784 *Salmonella typhimurium* pagC/pagD chromosomal region. *J Bacteriol* 177, 5040-5047.

785 Hautefort, I., Proenca, M.J., and Hinton, J.C. (2003). Single-copy green fluorescent protein gene fusions allow  
786 accurate measurement of *Salmonella* gene expression in vitro and during infection of mammalian cells. *Appl*  
787 *Environ Microbiol* 69, 7480-7491.

788 Hess, C.B., Niesel, D.W., and Klimpel, G.R. (1989). The induction of interferon production in fibroblasts by invasive  
789 bacteria: a comparison of *Salmonella* and *Shigella* species. *Microb Pathog* 7, 111-120.

790 Hos, N.J., Ganesan, R., Gutierrez, S., Hos, D., Klimek, J., Abdullah, Z., Kronke, M., and Robinson, N. (2017). Type I  
791 interferon enhances necroptosis of *Salmonella Typhimurium*-infected macrophages by impairing antioxidative  
792 stress responses. *J Cell Biol* 216, 4107-4121.

793 Hubel, P., Urban, C., Bergant, V., Schneider, W.M., Knauer, B., Stukalov, A., Scaturro, P., Mann, A., Brunotte, L.,  
794 Hoffmann, H.H., *et al.* (2019). A protein-interaction network of interferon-stimulated genes extends the innate  
795 immune system landscape. *Nature immunology* 20, 493-502.

796 Hurley, D., McCusker, M.P., Fanning, S., and Martins, M. (2014). *Salmonella*-host interactions - modulation of the  
797 host innate immune system. *Front Immunol* 5, 481.

798 Hybiske, K., and Stephens, R.S. (2008). Exit strategies of intracellular pathogens. *Nat Rev Microbiol* 6, 99-110.

799 Ji, D.X., Yamashiro, L.H., Chen, K.J., Mukaida, N., Kramnik, I., Darwin, K.H., and Vance, R.E. (2019). Type I  
800 interferon-driven susceptibility to *Mycobacterium tuberculosis* is mediated by IL-1Ra. *Nat Microbiol* 4, 2128-2135.

801 Knodler, L.A., Nair, V., and Steele-Mortimer, O. (2014). Quantitative assessment of cytosolic *Salmonella* in  
802 epithelial cells. *PLoS One* 9, e84681.

803 Kuhn, A., Musiol, A., Heitzig, N., Johnson, D.E., Ehrhardt, C., Grewal, T., Gerke, V., Ludwig, S., and Rescher, U.  
804 (2018). Late Endosomal/Lysosomal Cholesterol Accumulation Is a Host Cell-Protective Mechanism Inhibiting  
805 Endosomal Escape of Influenza A Virus. *mBio* 9.

806 Lauterbach, H., Bathke, B., Gilles, S., Traidl-Hoffmann, C., Luber, C.A., Fejer, G., Freudenberg, M.A., Davey, G.M.,  
807 Vremec, D., Kallies, A., *et al.* (2010). Mouse CD8alpha+ DCs and human BDCA3+ DCs are major producers of  
808 IFN-lambda in response to poly IC. *J Exp Med* 207, 2703-2717.

809 Li, W., Xu, H., Xiao, T., Cong, L., Love, M.I., Zhang, F., Irizarry, R.A., Liu, J.S., Brown, M., and Liu, X.S. (2014).  
810 MAGeCK enables robust identification of essential genes from genome-scale CRISPR/Cas9 knockout screens.  
811 *Genome Biol* 15, 554.

812 Li, X., Rydzewski, N., Hider, A., Zhang, X., Yang, J., Wang, W., Gao, Q., Cheng, X., and Xu, H. (2016). A molecular  
813 mechanism to regulate lysosome motility for lysosome positioning and tubulation. *Nat Cell Biol* 18, 404-417.

814 Myrdal, S.E., Johnson, K.C., and Steyger, P.S. (2005). Cytoplasmic and intra-nuclear binding of gentamicin does not  
815 require endocytosis. *Hear Res* 204, 156-169.

816 O'Connell, R.M., Saha, S.K., Vaidya, S.A., Bruhn, K.W., Miranda, G.A., Zarnegar, B., Perry, A.K., Nguyen, B.O., Lane,  
817 T.F., Taniguchi, T., *et al.* (2004). Type I interferon production enhances susceptibility to *Listeria monocytogenes*  
818 infection. *J Exp Med* 200, 437-445.

819 Omotade, T.O., and Roy, C.R. (2019). Manipulation of Host Cell Organelles by Intracellular Pathogens.  
820 *Microbiology spectrum* 7.

821 Perkins, D.J., Rajaiah, R., Tennant, S.M., Ramachandran, G., Higginson, E.E., Dyson, T.N., and Vogel, S.N. (2015).  
822 *Salmonella Typhimurium* Co-opts the Host Type I IFN System To Restrict Macrophage Innate Immune  
823 Transcriptional Responses Selectively. *Journal of immunology* 195, 2461-2471.

824 Philpott, D.J., Girardin, S.E., and Sansonetti, P.J. (2001). Innate immune responses of epithelial cells following

825 infection with bacterial pathogens. *Current opinion in immunology* *13*, 410-416.

826 Prost, L.R., Daley, M.E., Le Sage, V., Bader, M.W., Le Moual, H., Klevit, R.E., and Miller, S.I. (2007). Activation of the  
827 bacterial sensor kinase PhoQ by acidic pH. *Mol Cell* *26*, 165-174.

828 Reddick, L.E., and Alto, N.M. (2014). Bacteria fighting back: how pathogens target and subvert the host innate  
829 immune system. *Mol Cell* *54*, 321-328.

830 Reis, R.C., Sorgine, M.H., and Coelho-Sampaio, T. (1998). A novel methodology for the investigation of intracellular  
831 proteolytic processing in intact cells. *Eur J Cell Biol* *75*, 192-197.

832 Robinson, N., McComb, S., Mulligan, R., Dudani, R., Krishnan, L., and Sad, S. (2012). Type I interferon induces  
833 necroptosis in macrophages during infection with *Salmonella enterica* serovar Typhimurium. *Nature immunology*  
834 *13*, 954-962.

835 Roy, D., Liston, D.R., Idone, V.J., Di, A., Nelson, D.J., Pujol, C., Bliska, J.B., Chakrabarti, S., and Andrews, N.W. (2004).  
836 A process for controlling intracellular bacterial infections induced by membrane injury. *Science* *304*, 1515-1518.

837 Santos, J.C., Duchateau, M., Fredlund, J., Weiner, A., Mallet, A., Schmitt, C., Matondo, M., Hourdel, V.,  
838 Chamot-Rooke, J., and Enninga, J. (2015). The COPII complex and lysosomal VAMP7 determine intracellular  
839 *Salmonella* localization and growth. *Cell Microbiol* *17*, 1699-1720.

840 Schoggins, J.W., MacDuff, D.A., Imanaka, N., Gainey, M.D., Shrestha, B., Eitson, J.L., Mar, K.B., Richardson, R.B.,  
841 Ratushny, A.V., Litvak, V., *et al.* (2014). Pan-viral specificity of IFN-induced genes reveals new roles for cGAS in  
842 innate immunity. *Nature* *505*, 691-695.

843 Steele-Mortimer, O. (2008). The *Salmonella*-containing vacuole: moving with the times. *Curr Opin Microbiol* *11*,  
844 38-45.

845 Stefan, K.L., Fink, A., Surana, N.K., Kasper, D.L., and Dasgupta, S. (2017). Type I interferon signaling restrains  
846 IL-10R+ colonic macrophages and dendritic cells and leads to more severe *Salmonella* colitis. *PLoS One* *12*,  
847 e0188600.

848 Thurston, T.L., Wandel, M.P., von Muhlinen, N., Foeglein, A., and Randow, F. (2012). Galectin 8 targets damaged  
849 vesicles for autophagy to defend cells against bacterial invasion. *Nature* *482*, 414-418.

850 Tuli, A., and Sharma, M. (2019). How to do business with lysosomes: *Salmonella* leads the way. *Curr Opin*  
851 *Microbiol* *47*, 1-7.

852 Unsworth, K.E., Way, M., McNiven, M., Machesky, L., and Holden, D.W. (2004). Analysis of the mechanisms of  
853 *Salmonella*-induced actin assembly during invasion of host cells and intracellular replication. *Cell Microbiol* *6*,  
854 1041-1055.

855 Wee, Y.S., Roundy, K.M., Weis, J.J., and Weis, J.H. (2012). Interferon-inducible transmembrane proteins of the  
856 innate immune response act as membrane organizers by influencing clathrin and v-ATPase localization and  
857 function. *Innate Immun* *18*, 834-845.

858 Wilson, R.P., Tursi, S.A., Rapsinski, G.J., Medeiros, N.J., Le, L.S., Kotredes, K.P., Patel, S., Liverani, E., Sun, S., Zhu, W.,  
859 *et al.* (2019). STAT2 dependent Type I Interferon response promotes dysbiosis and luminal expansion of the  
860 enteric pathogen *Salmonella* Typhimurium. *PLoS Pathog* *15*, e1007745.

861 Xu, Y., Zhou, P., Cheng, S., Lu, Q., Nowak, K., Hopp, A.K., Li, L., Shi, X., Zhou, Z., Gao, W., *et al.* (2019). A Bacterial  
862 Effector Reveals the V-ATPase-ATG16L1 Axis that Initiates Xenophagy. *Cell* *178*, 552-566 e520.

863 Yeung, A.T.Y., Choi, Y.H., Lee, A.H.Y., Hale, C., Ponstingl, H., Pickard, D., Goulding, D., Thomas, M., Gill, E., Kim, J.K.,  
864 *et al.* (2019). A Genome-Wide Knockout Screen in Human Macrophages Identified Host Factors Modulating  
865 *Salmonella* Infection. *mBio* *10*.

866 Yoshimori, T., Yamamoto, A., Moriyama, Y., Futai, M., and Tashiro, Y. (1991). Bafilomycin A1, a specific inhibitor of  
867 vacuolar-type H(+)-ATPase, inhibits acidification and protein degradation in lysosomes of cultured cells. *J Biol*  
868 *Chem* 266, 17707-17712.

869 Zhang, G., deWeerd, N.A., Stifter, S.A., Liu, L., Zhou, B., Wang, W., Zhou, Y., Ying, B., Hu, X., Matthews, A.Y., *et al.*  
870 (2018). A proline deletion in IFNAR1 impairs IFN-signaling and underlies increased resistance to tuberculosis in  
871 humans. *Nat Commun* 9, 85.

872

873

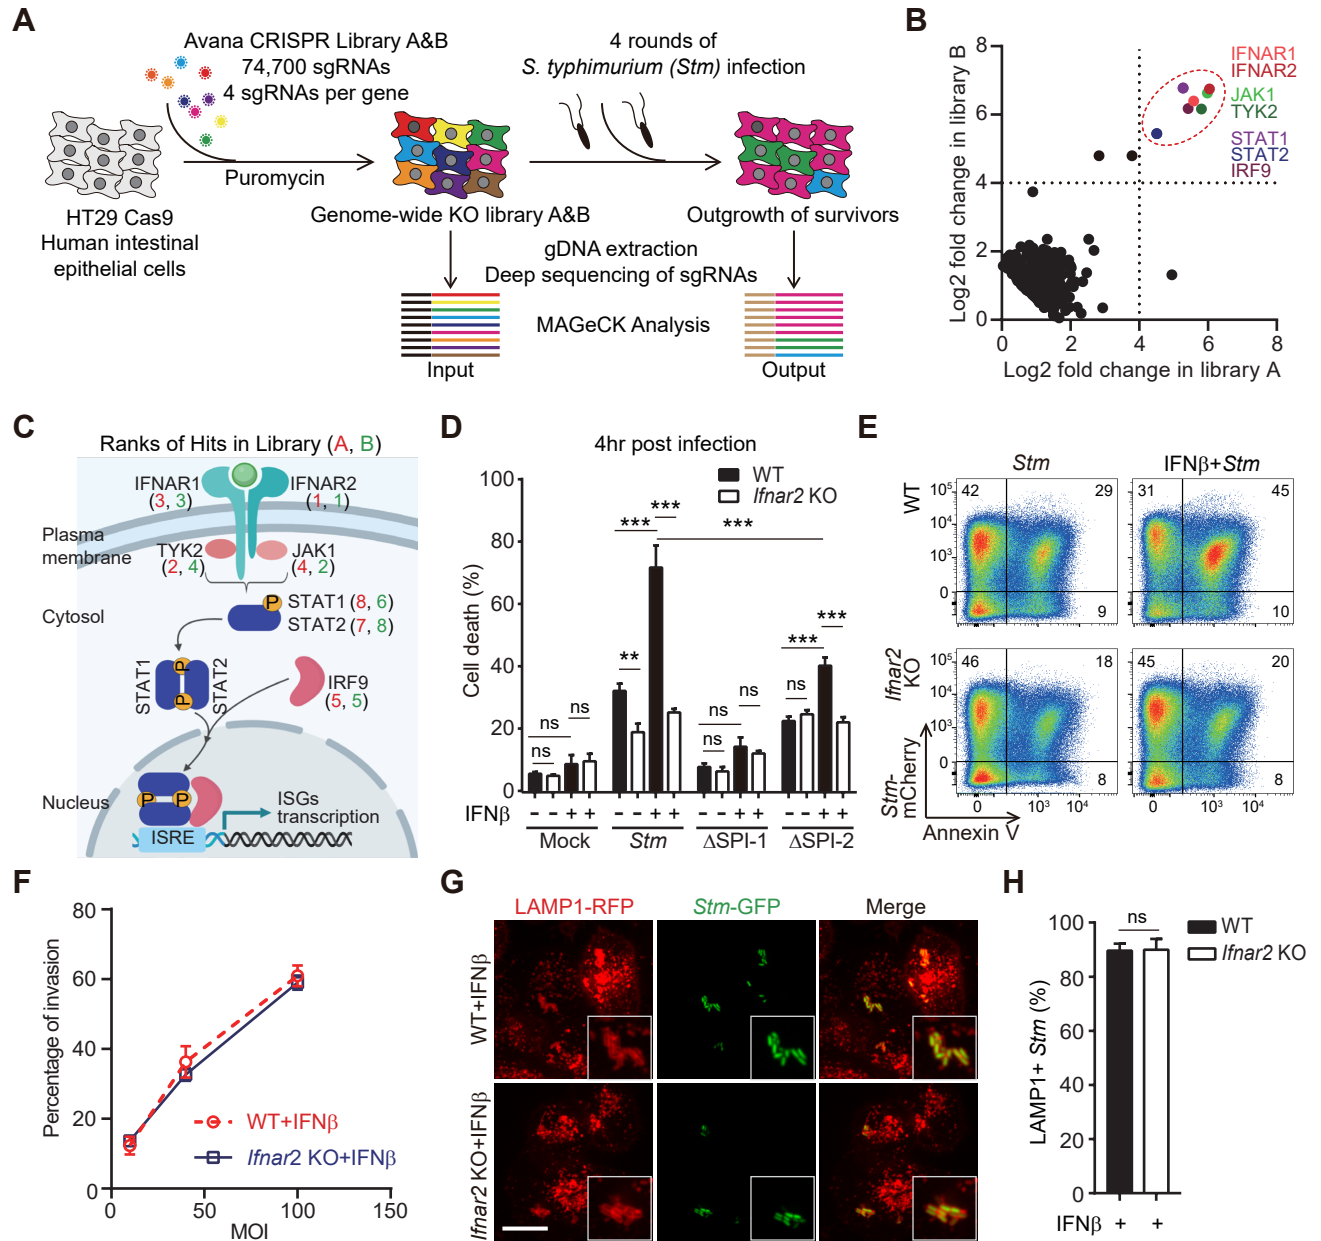

Figure. 1

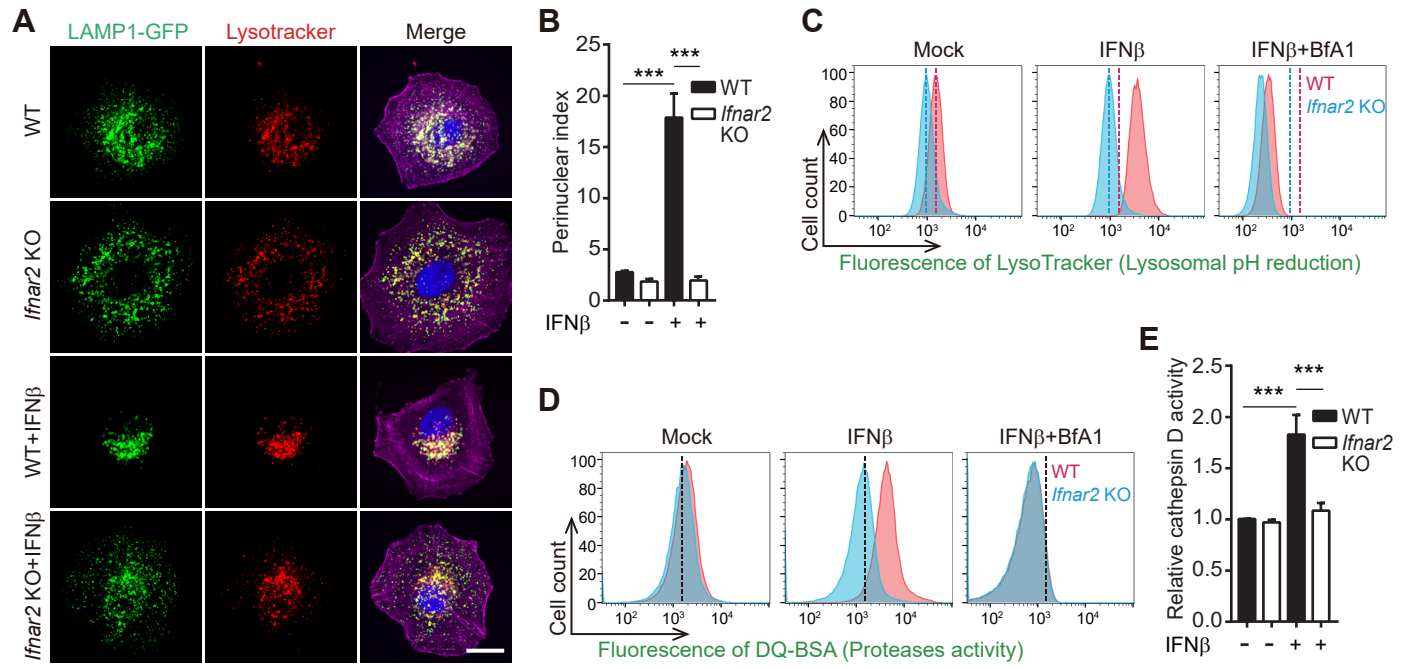

**Figure. 2**

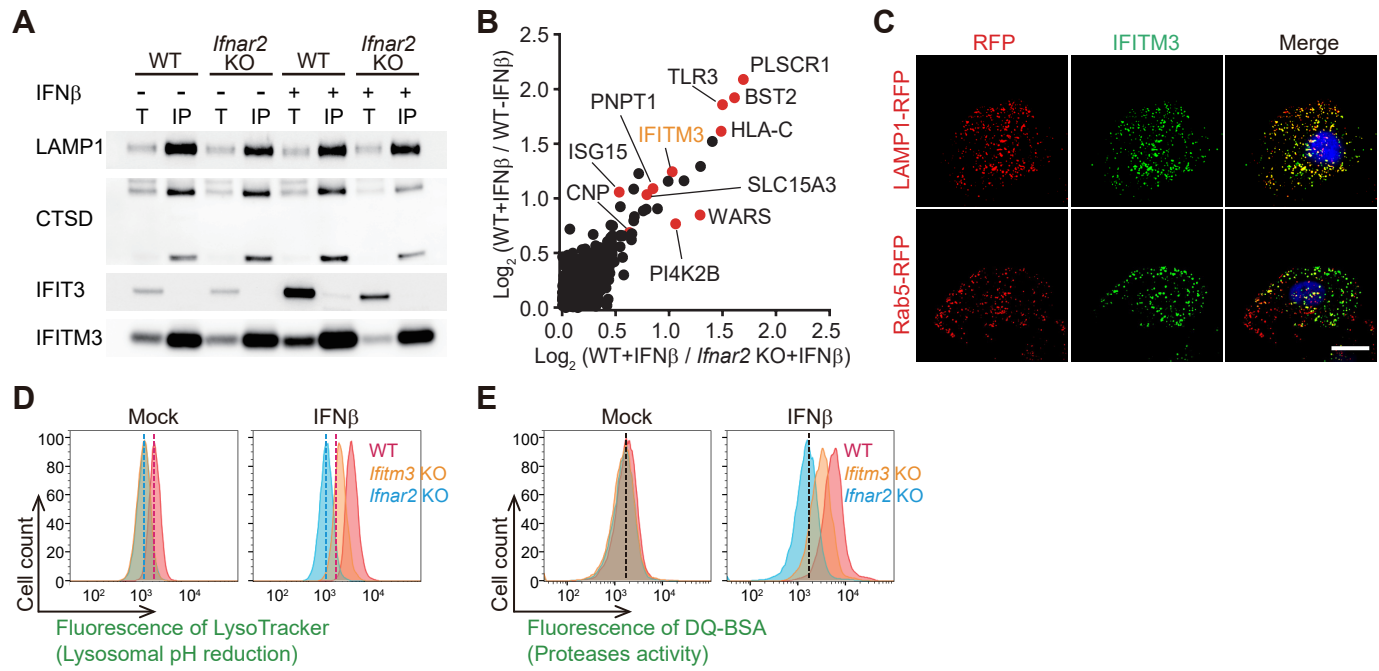

**Figure. 3**

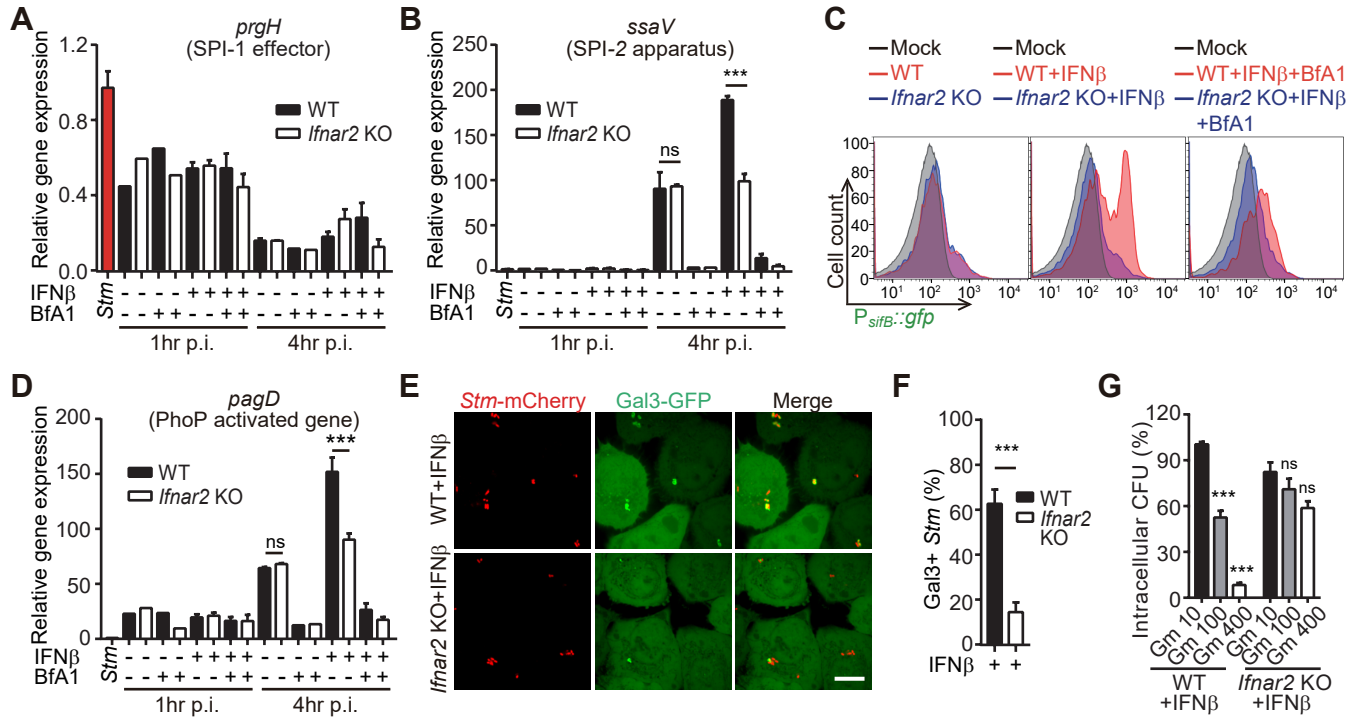

Figure. 4

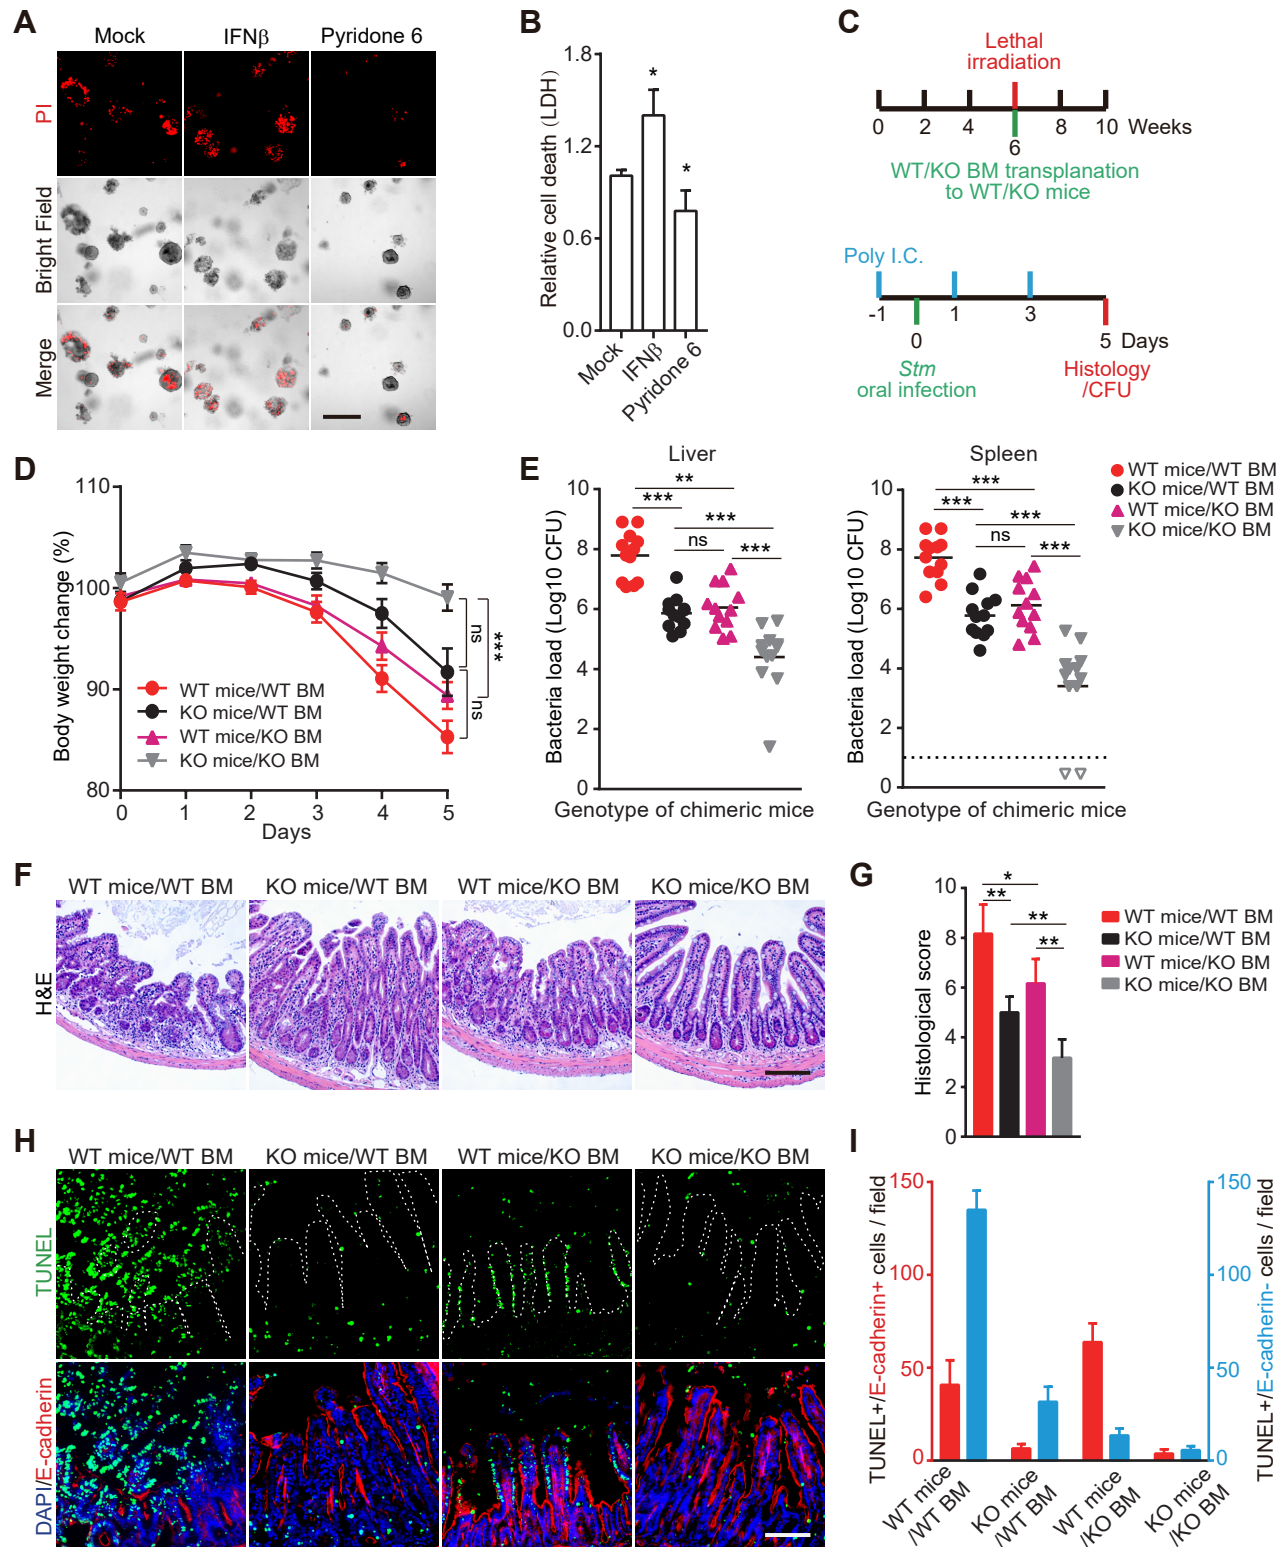

Figure. 5
